# Supplementary material for: Characterization and Identification of Bioactive Polyphenols in the Trapa bispinosa Roxb. Pericarp Extract
Source: MDPI journal article supplement (doi:10.3390/molecules26195802), 2021-09-24
Supplement: s1 [file s1]

**Characterization and identification of bioactive polyphenols in the  
*Trapa bispinosa* Roxb. pericarp extract**

Yuji Iwaoka<sup>1</sup>, Shoichi Suzuki<sup>1</sup>, Nana Kato<sup>1</sup>, Chisa Hayakawa<sup>1</sup>, Satoko Kawabe<sup>1</sup>, Natsuki Ganeko<sup>1</sup>, Tomohiro Uemura<sup>2</sup>, and Hideyuki Ito<sup>1,\*</sup>

*<sup>1</sup>Department of Nutritional Science, Faculty of Health and Welfare Sciences, Okayama Prefectural University, 111 Kuboki, Soja, Okayama 719-1197, Japan*

*<sup>2</sup>Hayashikane Sangyo Co., Ltd. 2-4-8 Yamatomachi, Shimonoseki, Yamaguchi 750-8608, Japan*

\*Corresponding author:

Hideyuki Ito

Department of Nutritional Science, Faculty of Health and Welfare Sciences, Okayama Prefectural University, 111 Kuboki, Soja, Okayama 719-1197, Japan.

e-mail: hito@fhw.oka-pu.ac.jp

## Supporting Information

Figure. S1. 1D and 2D-NMR spectra of (7'*S*, 8'*R*)-dihydrodehydrodiconiferyl alcohol-9'-*O*-β-D-glucoside (**10**). <sup>1</sup>H-NMR (A), <sup>13</sup>C-NMR (B), HSQC (C), HMBC (D), and NOESY (E) spectra.

Figure. S2. <sup>1</sup>H-NMR spectrum of compounds **13** (A) and **14** (B).

Figure. S3. 1D and 2D-NMR spectra of rubuphenol (**11**) and eschweilenol A (**12**). <sup>1</sup>H-NMR (A), and NOESY (B) spectra.

Figure. S4. 1D and 2D-NMR spectra of compounds **15–18**. <sup>1</sup>H-NMR (A), <sup>1</sup>H-<sup>1</sup>H COSY (B), and NOESY (C) spectra.

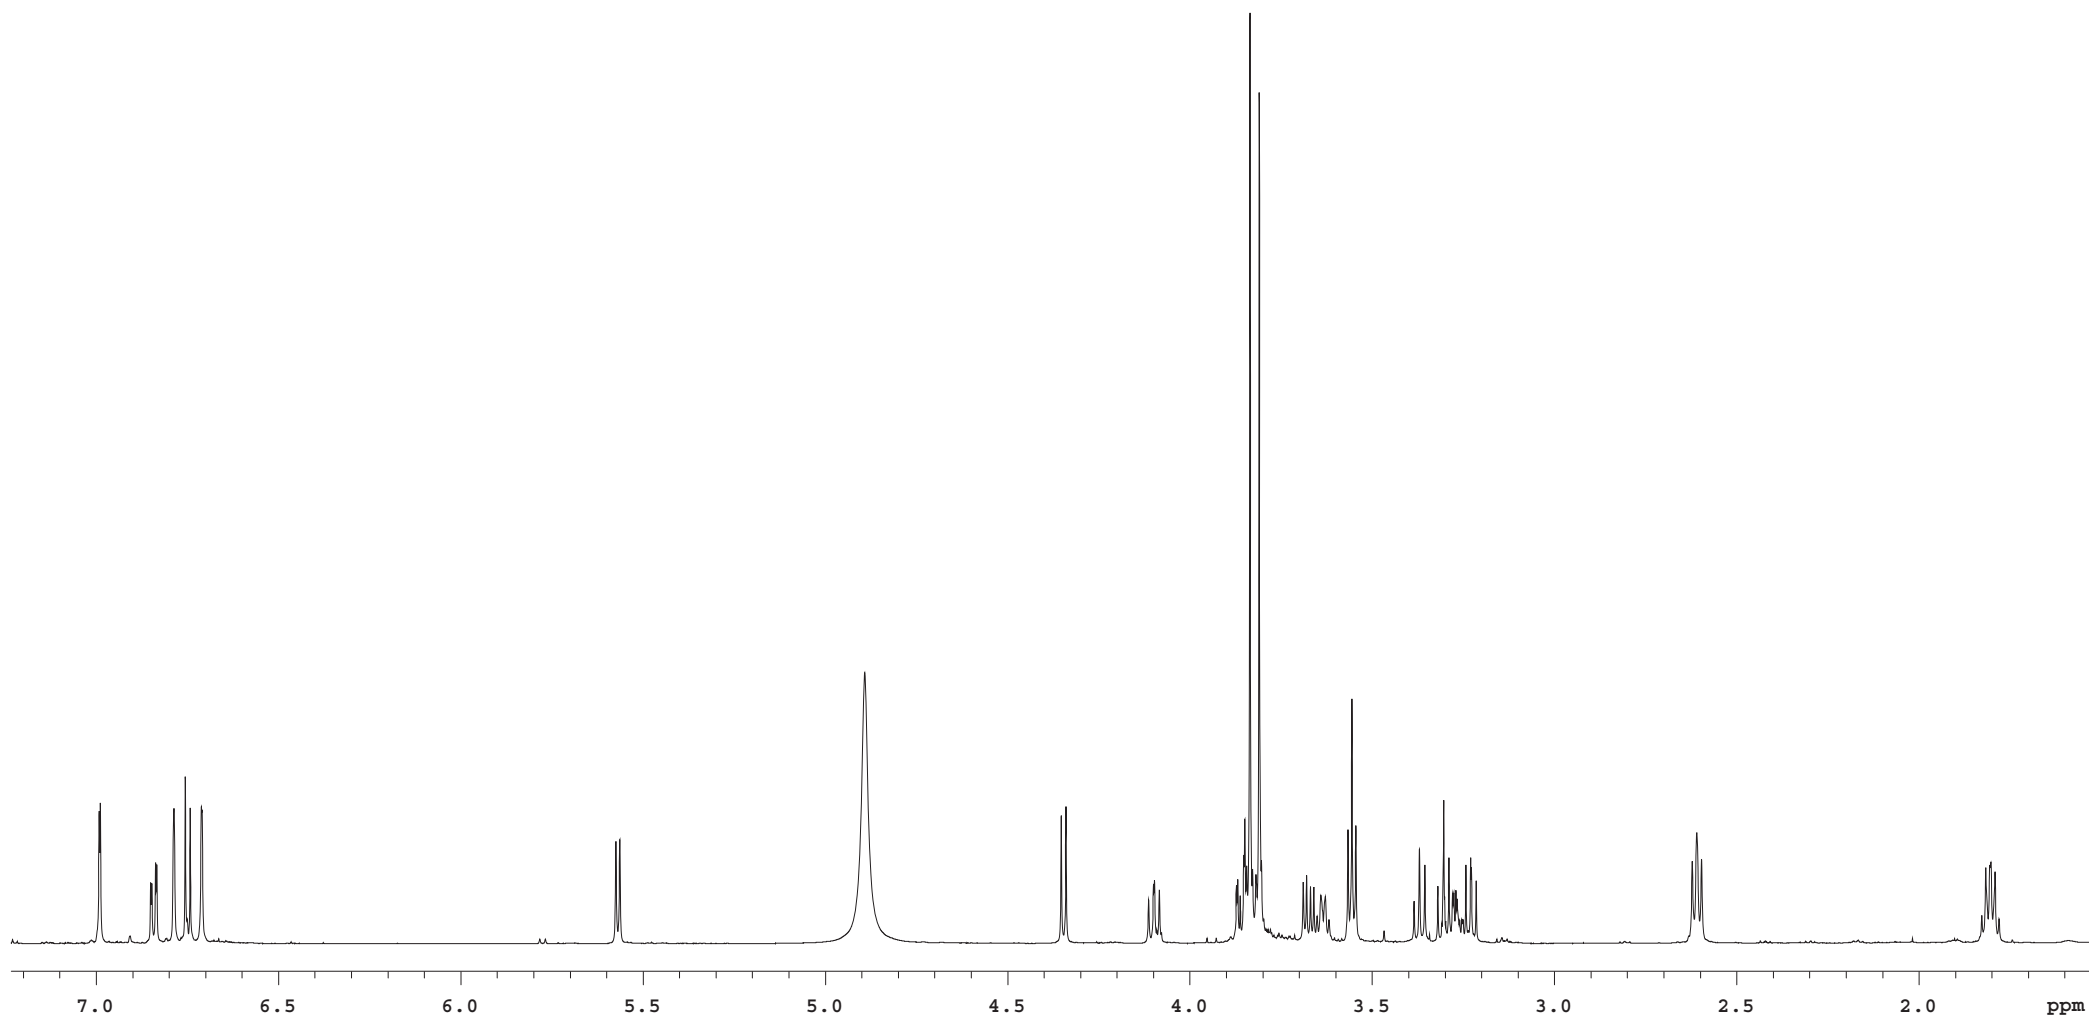

Figure.S1A

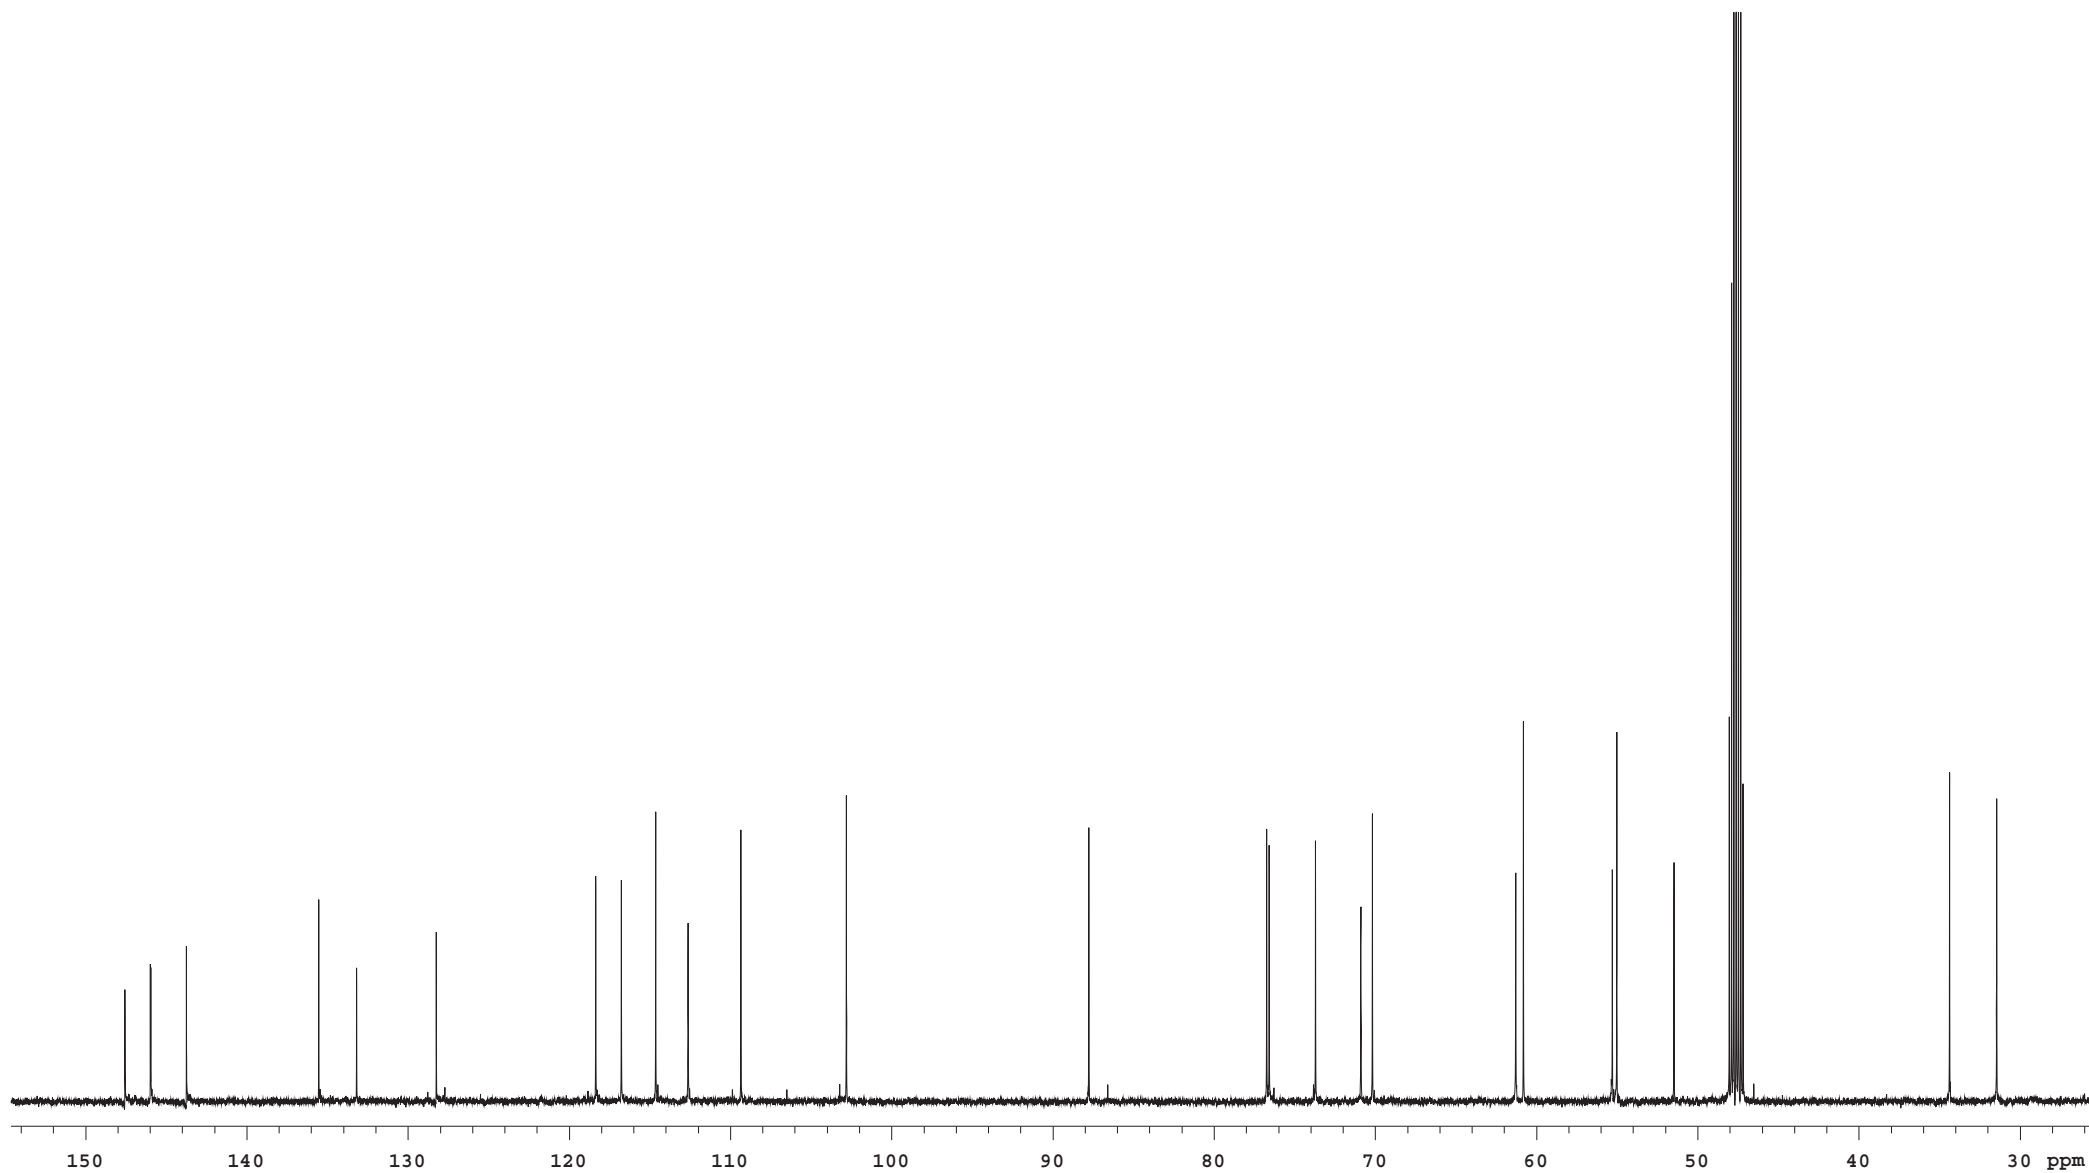

Figure. S1B

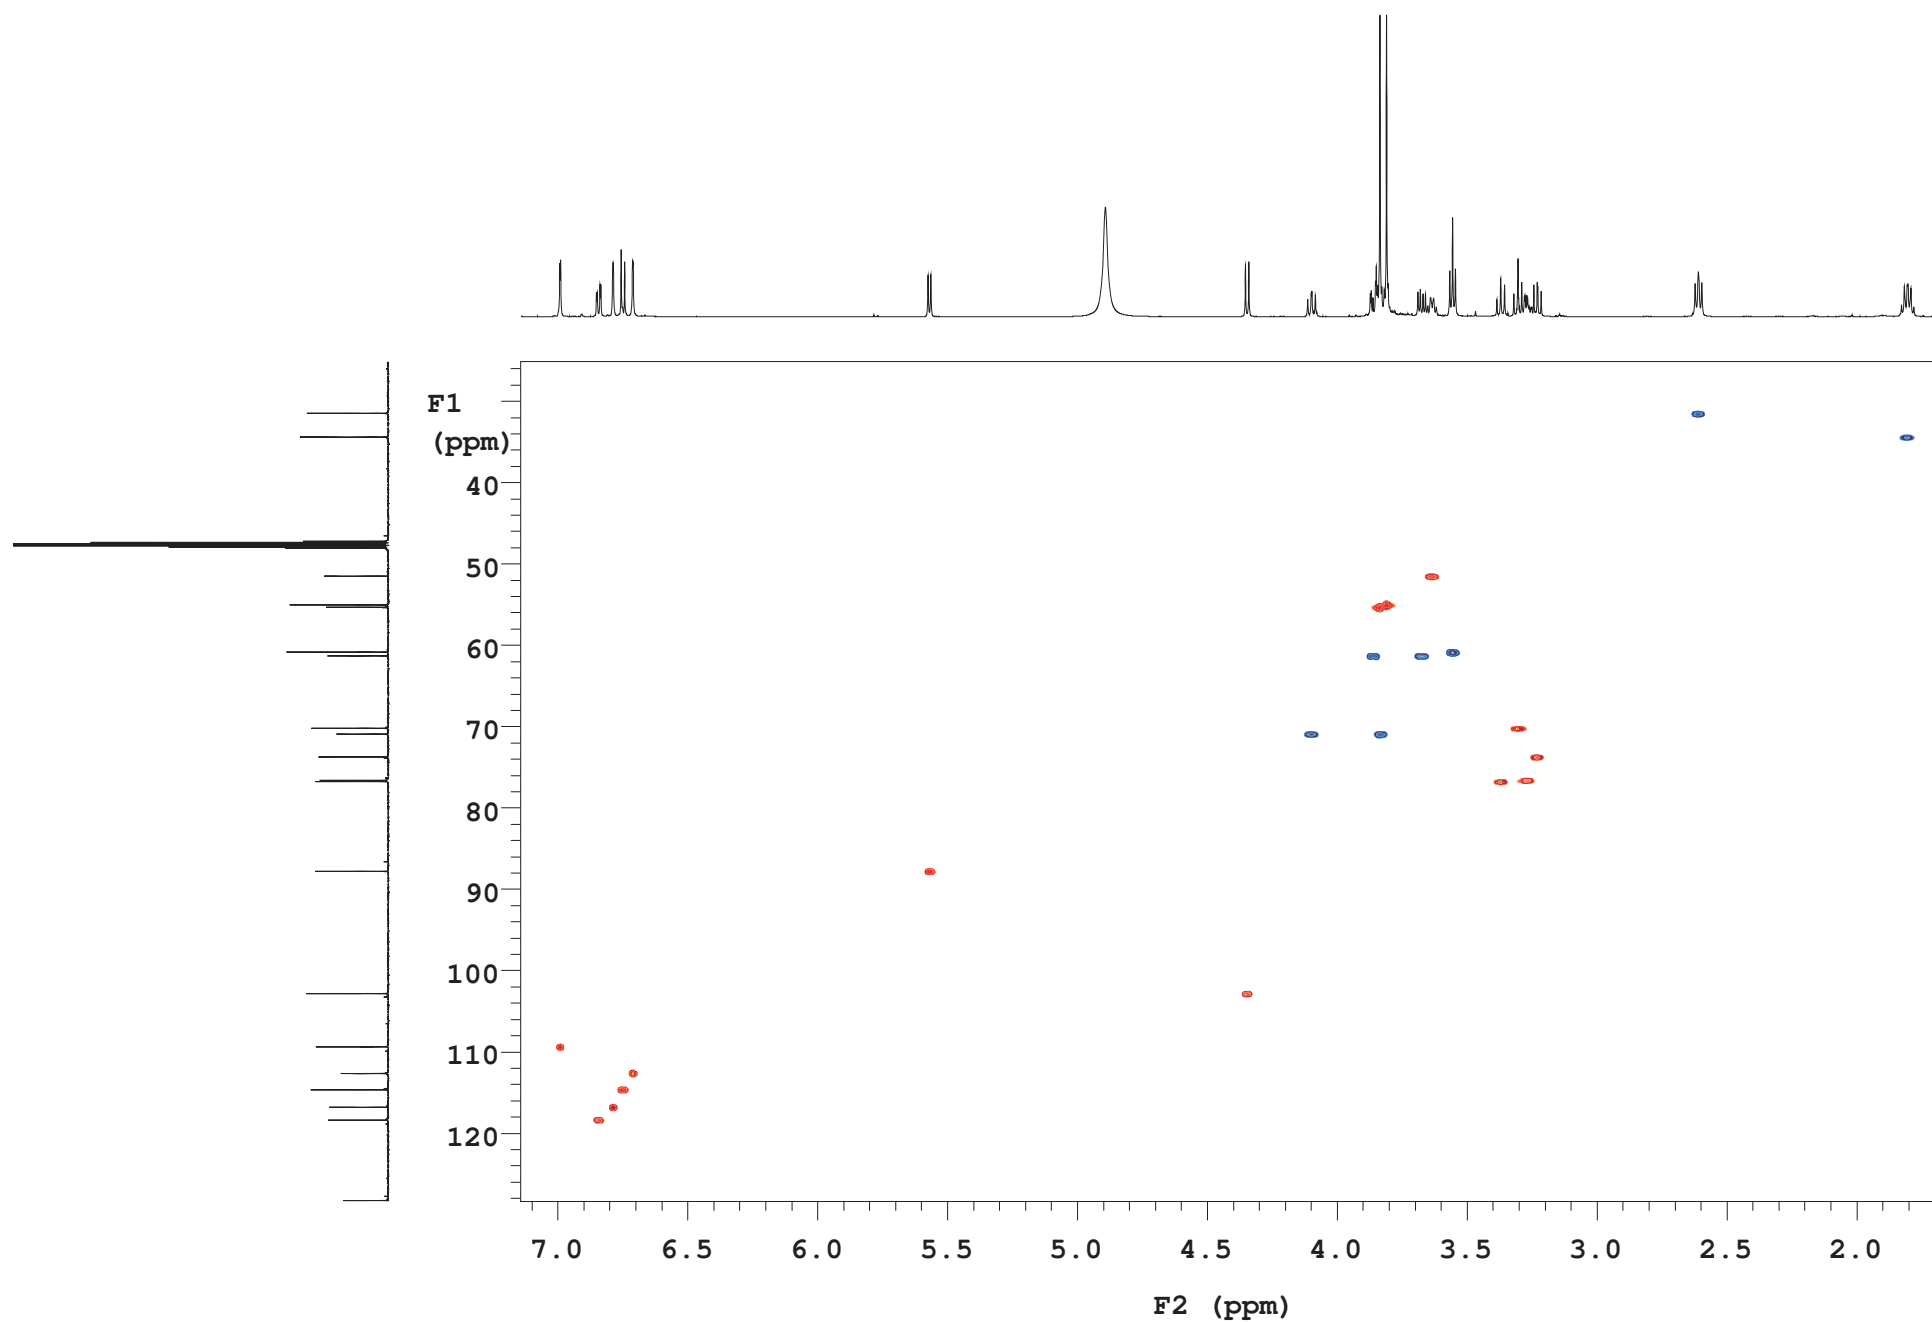

Figure. S1C

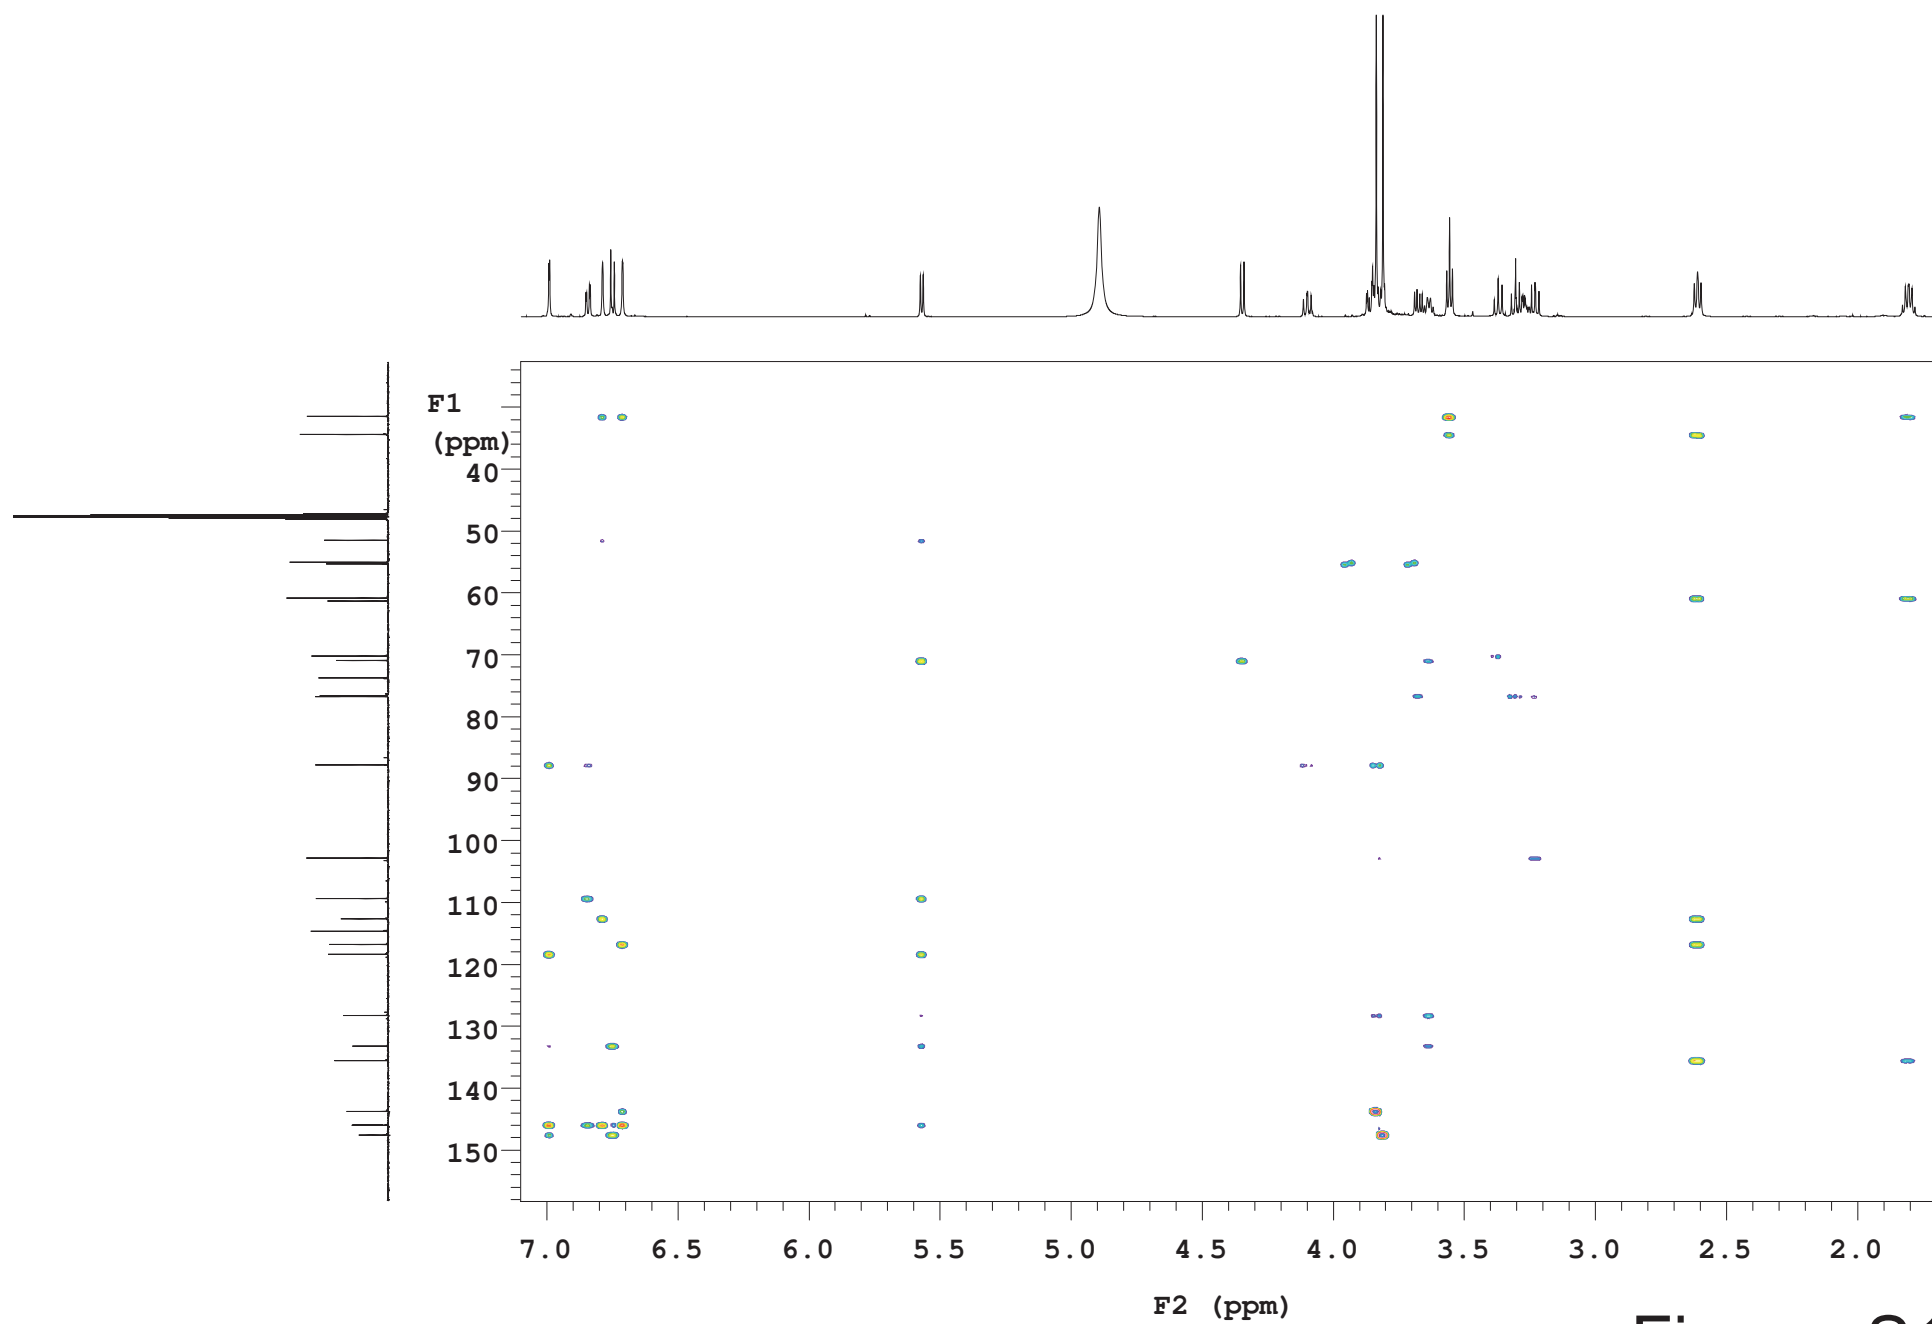

Figure. S1D

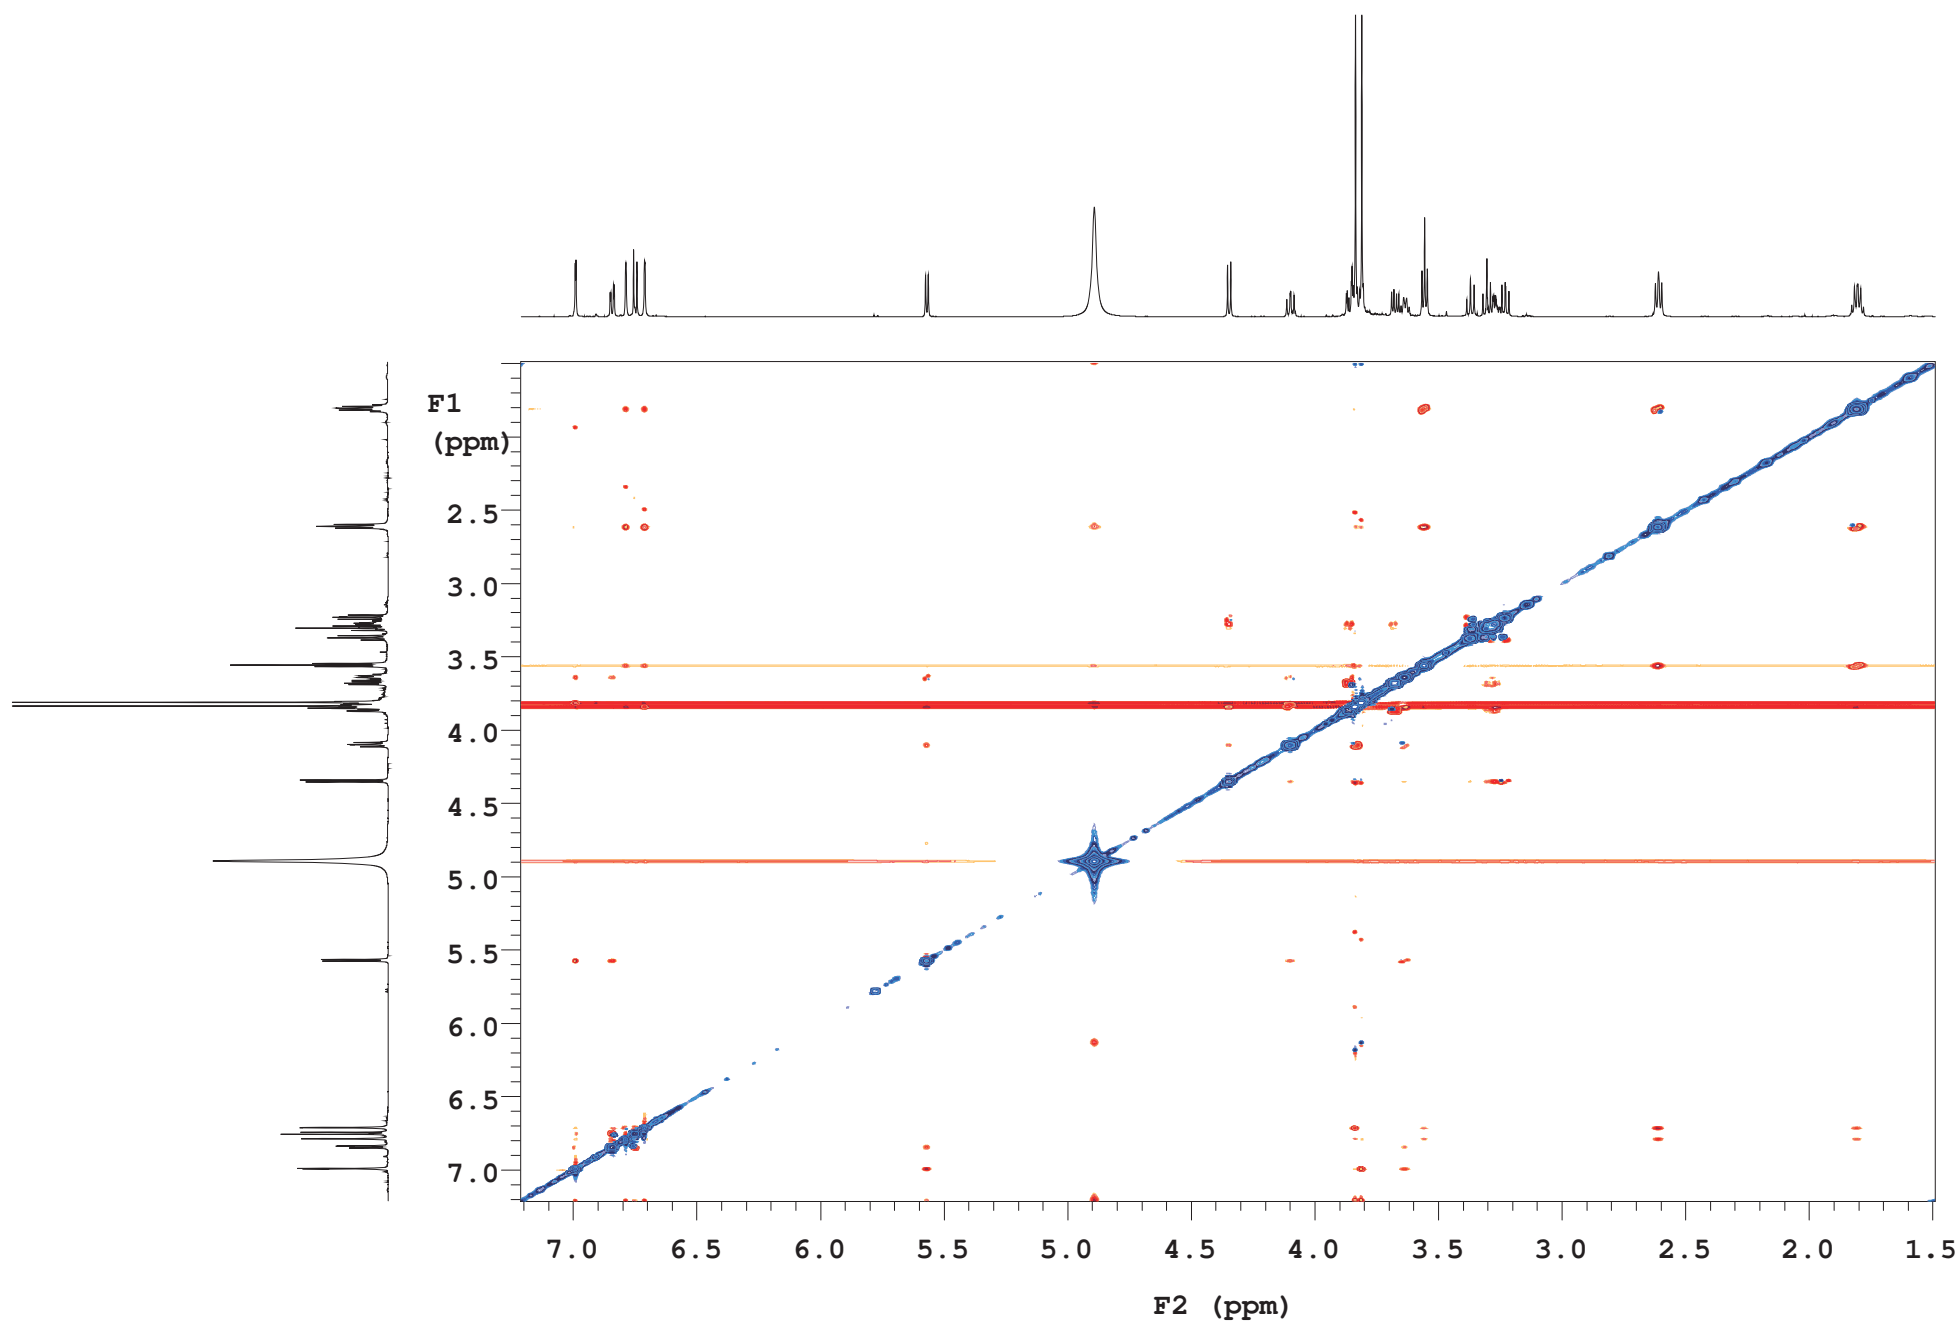

Figure. S1E

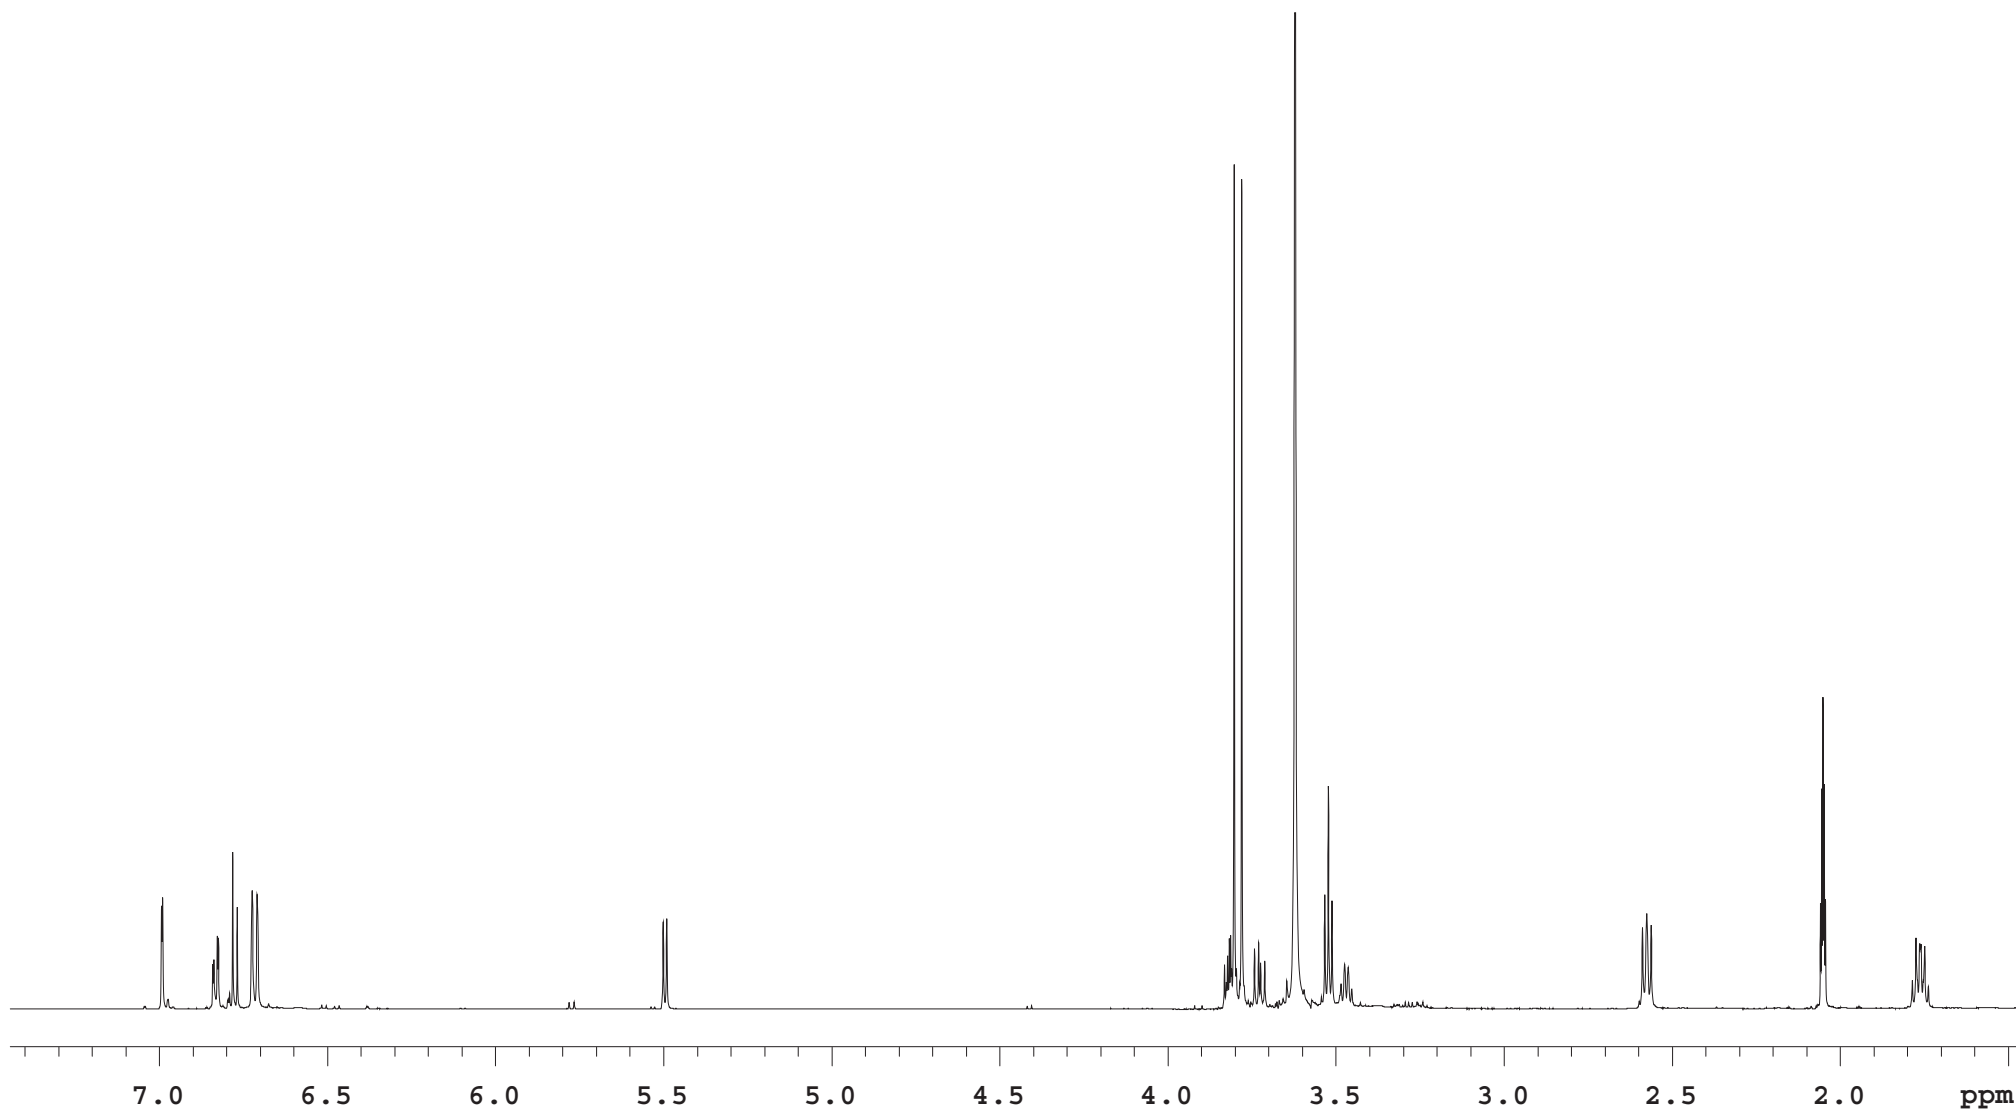

Figure. S2A



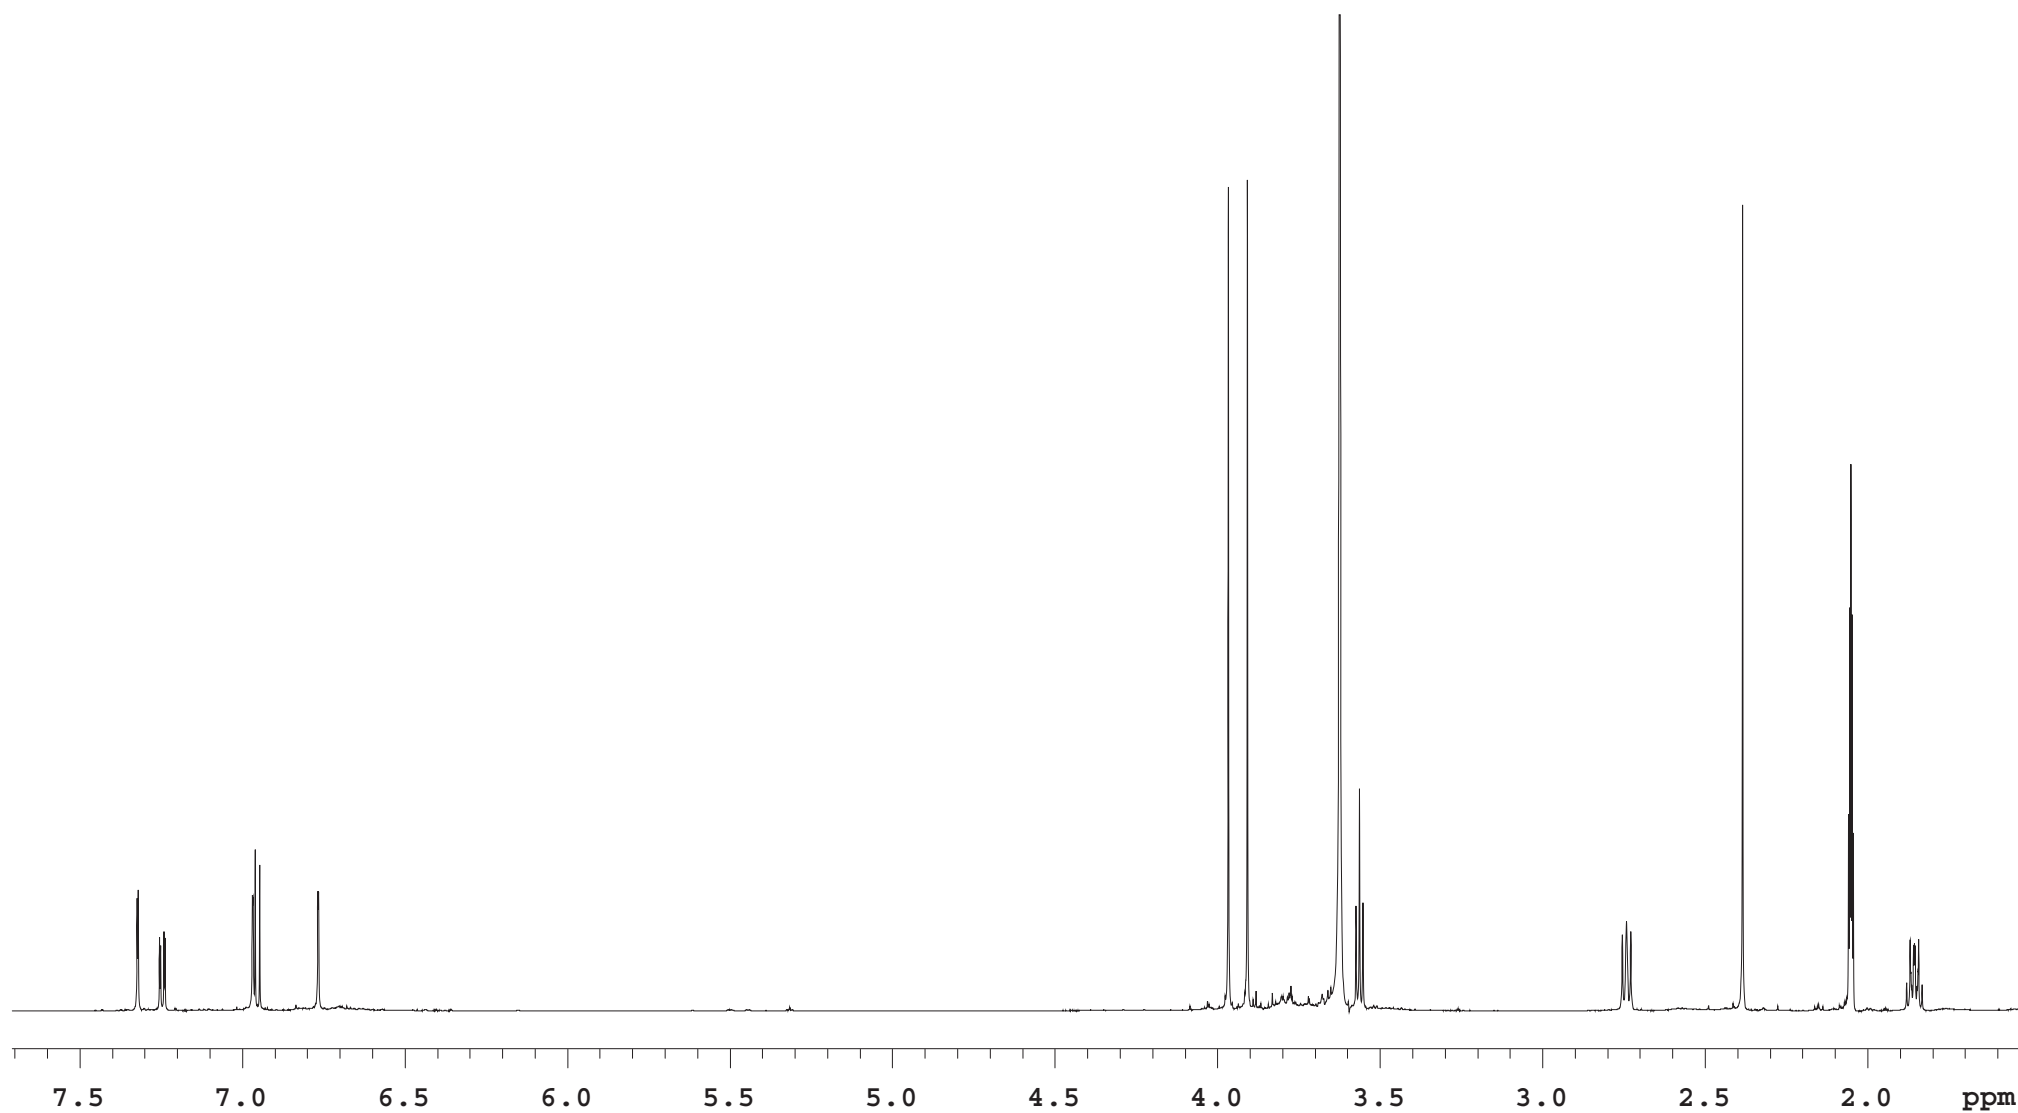

Figure. S2B

# Rubuphenol (**11**)

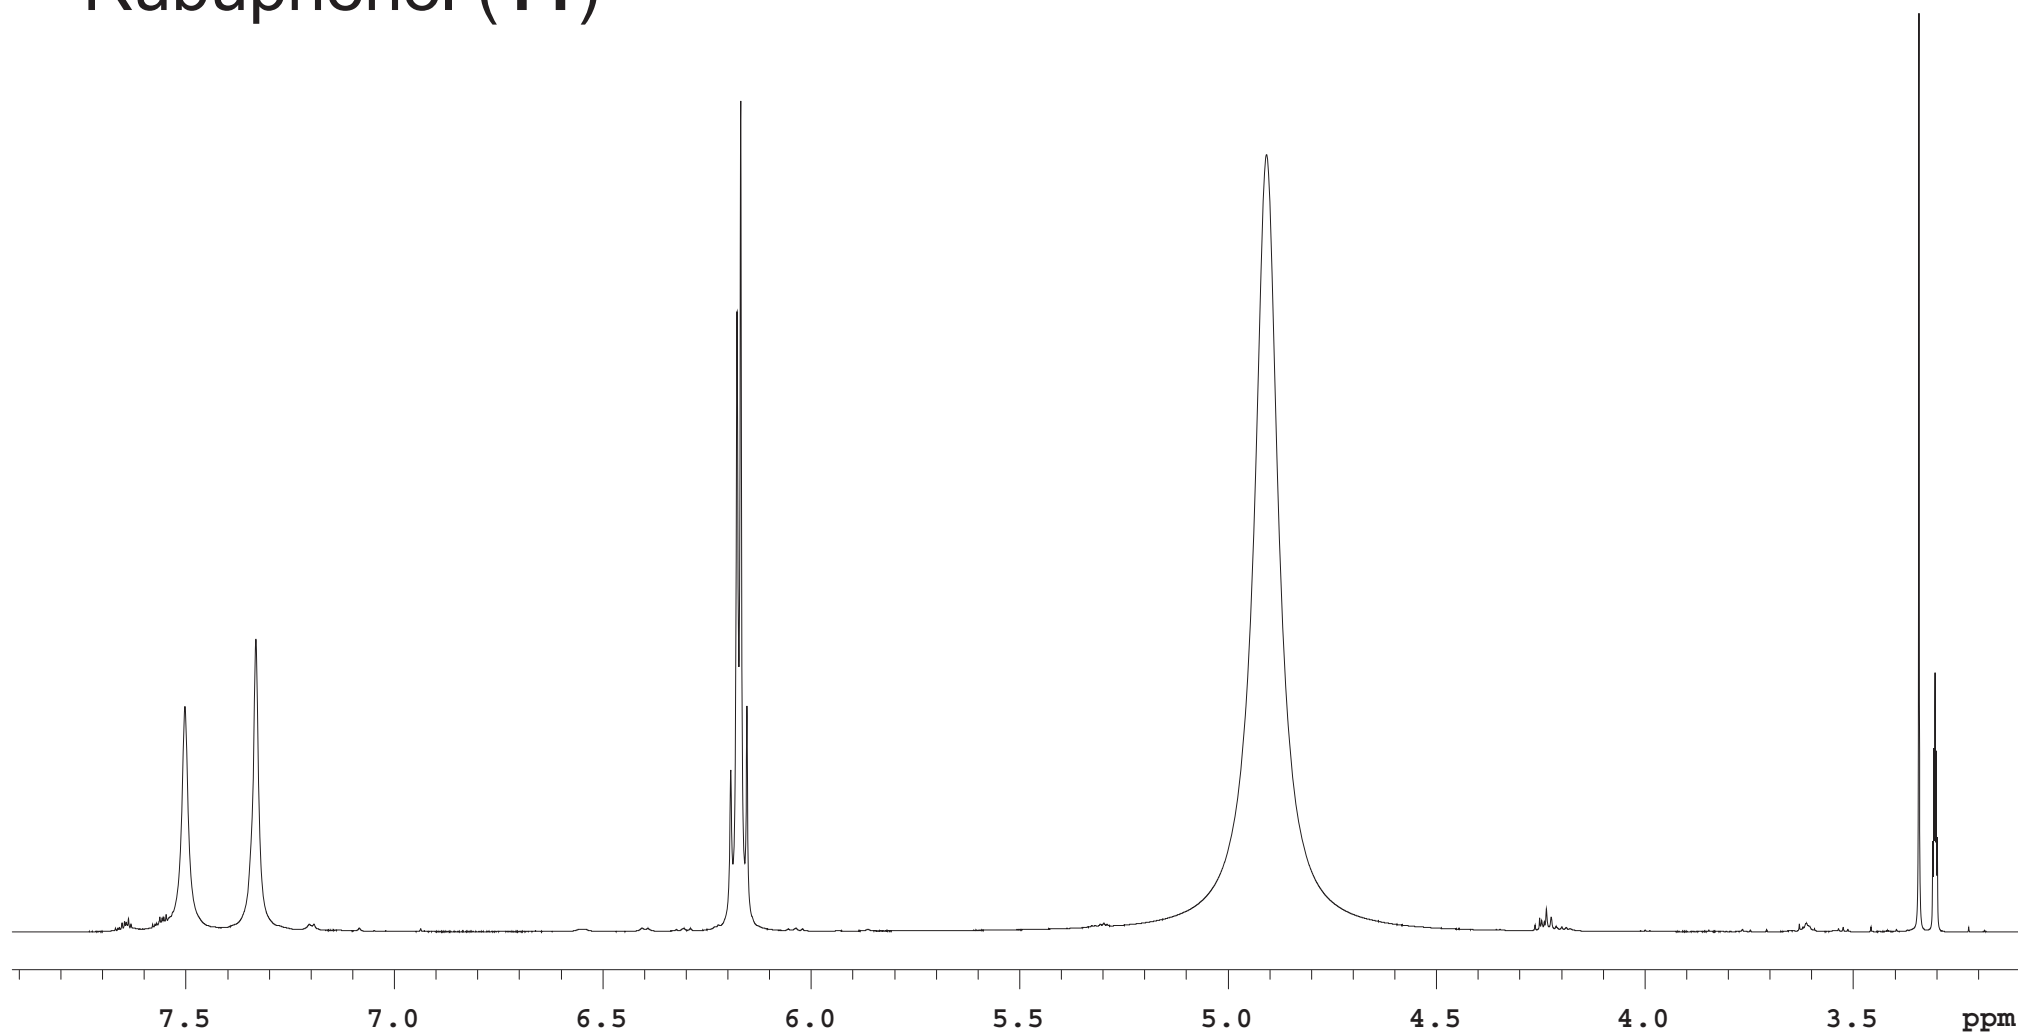

Figure. S3A

# Rubuphenol (**11**)

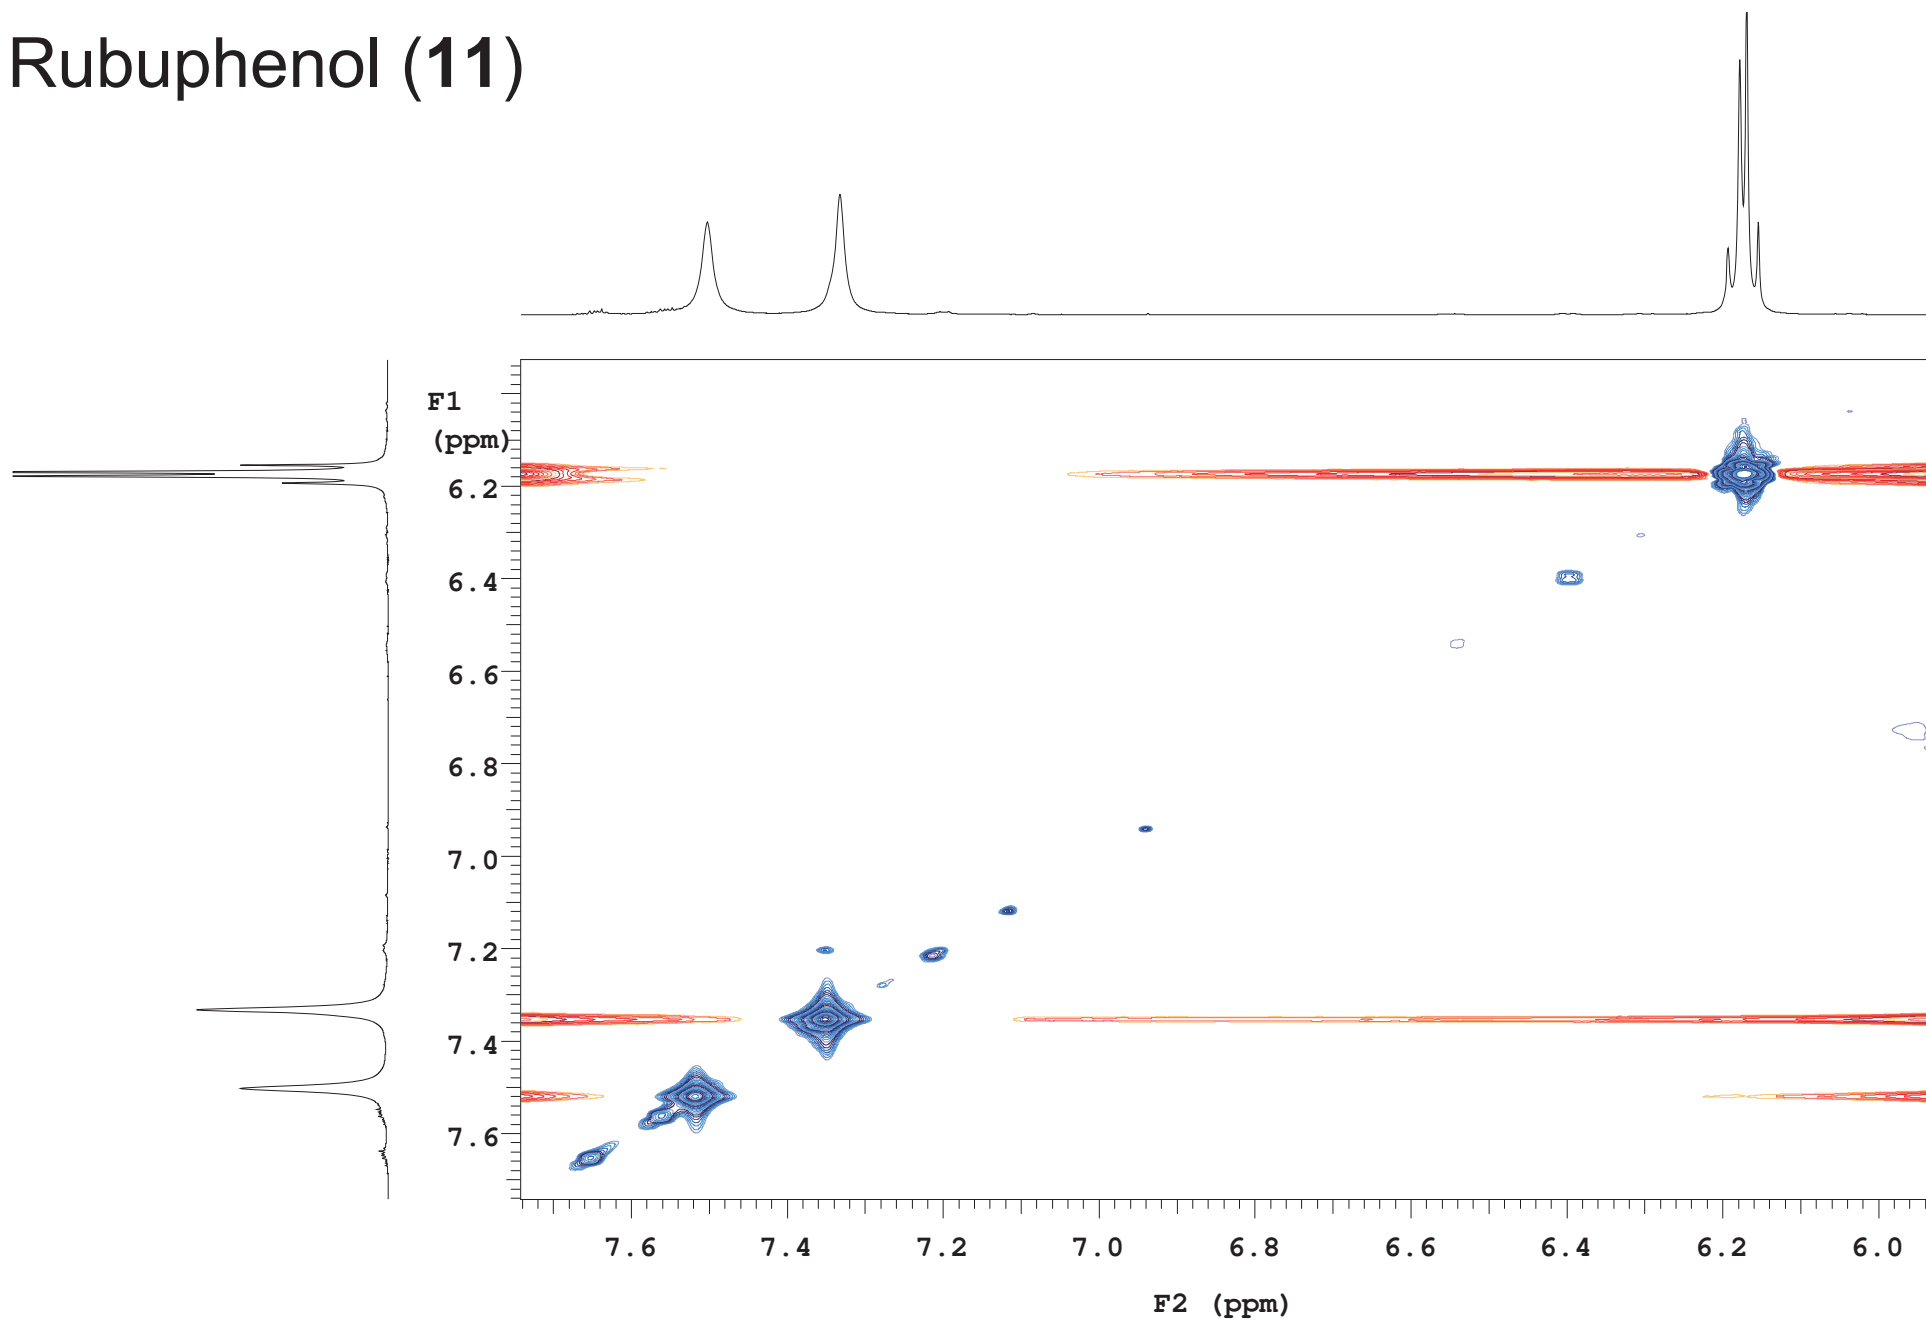

Figure. S3B

# Eschweilenol A (12)

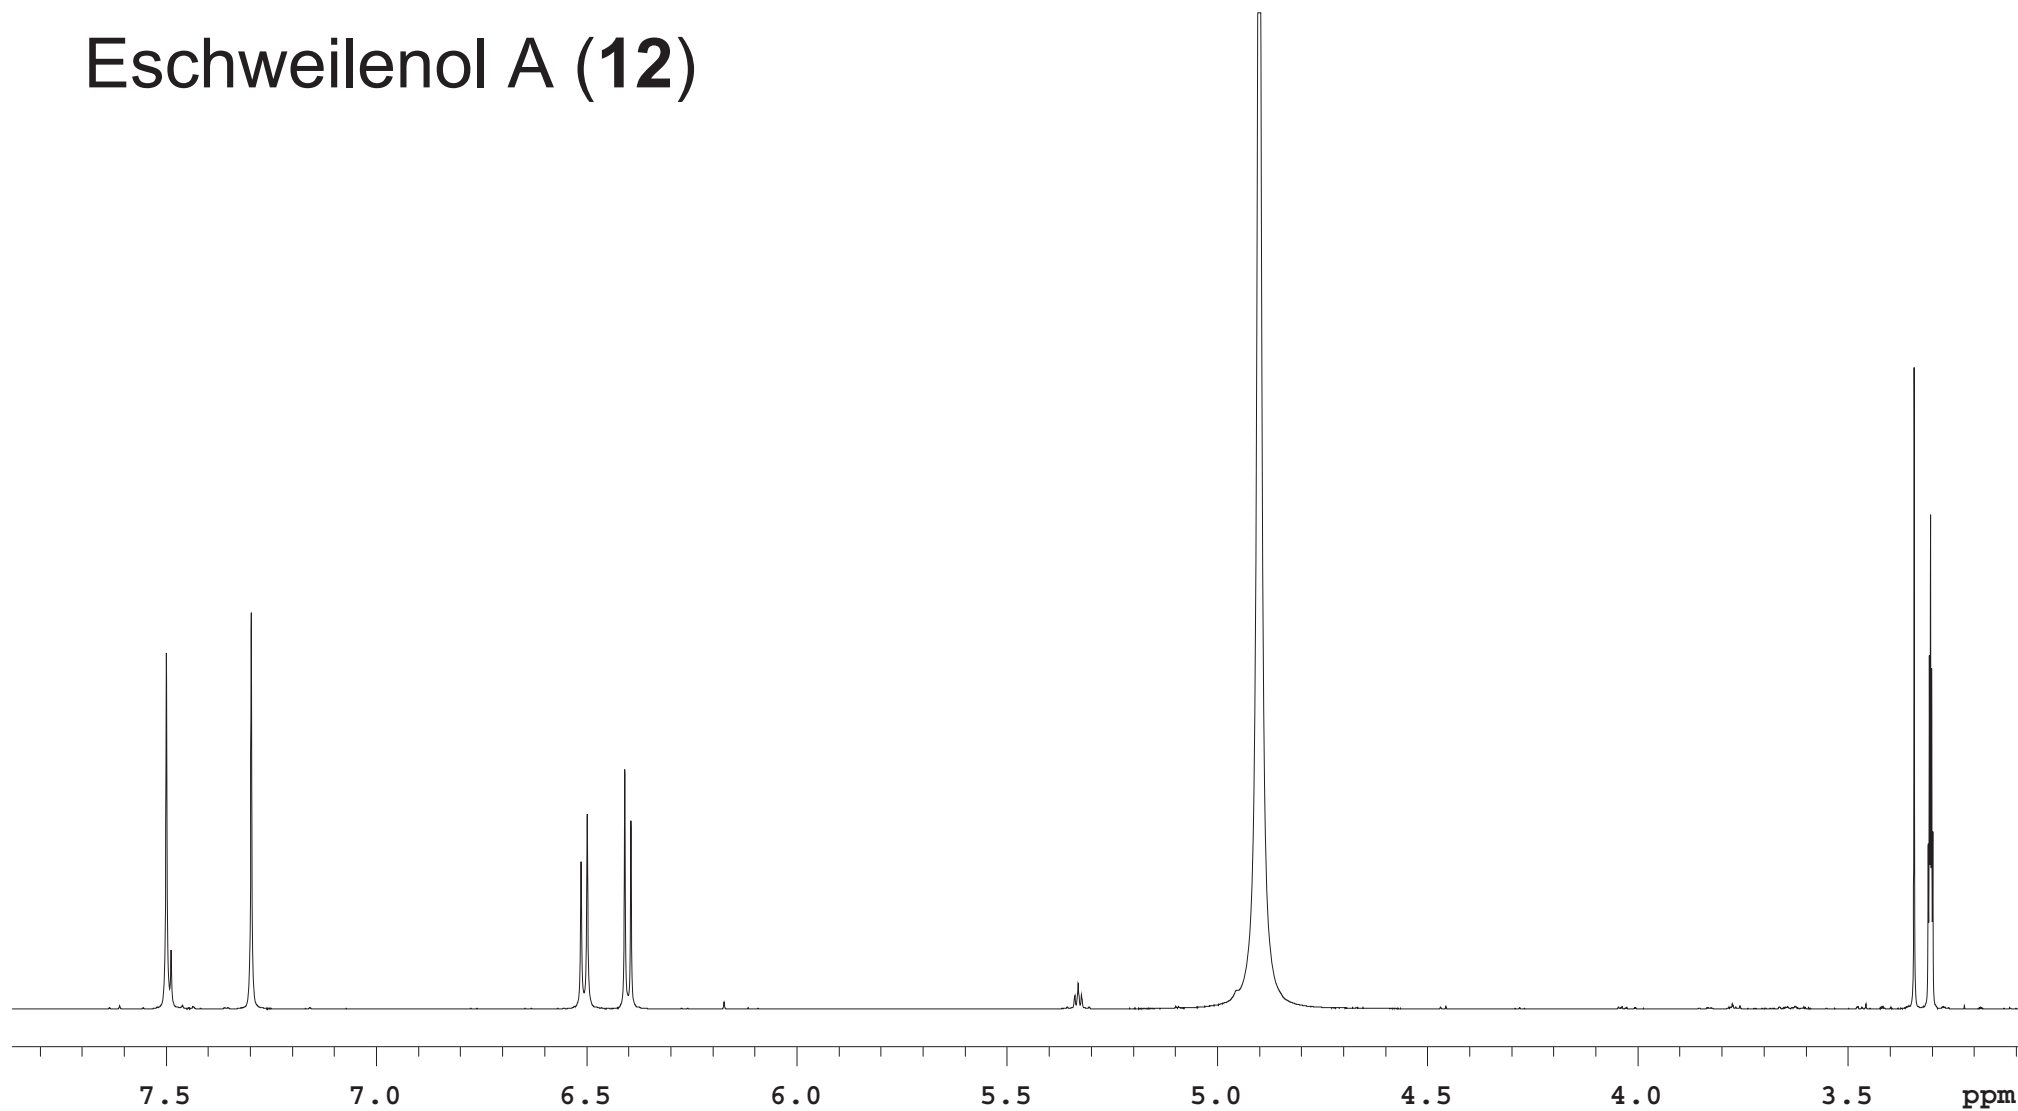

Figure. S3A

# Eschweilenol A (12)

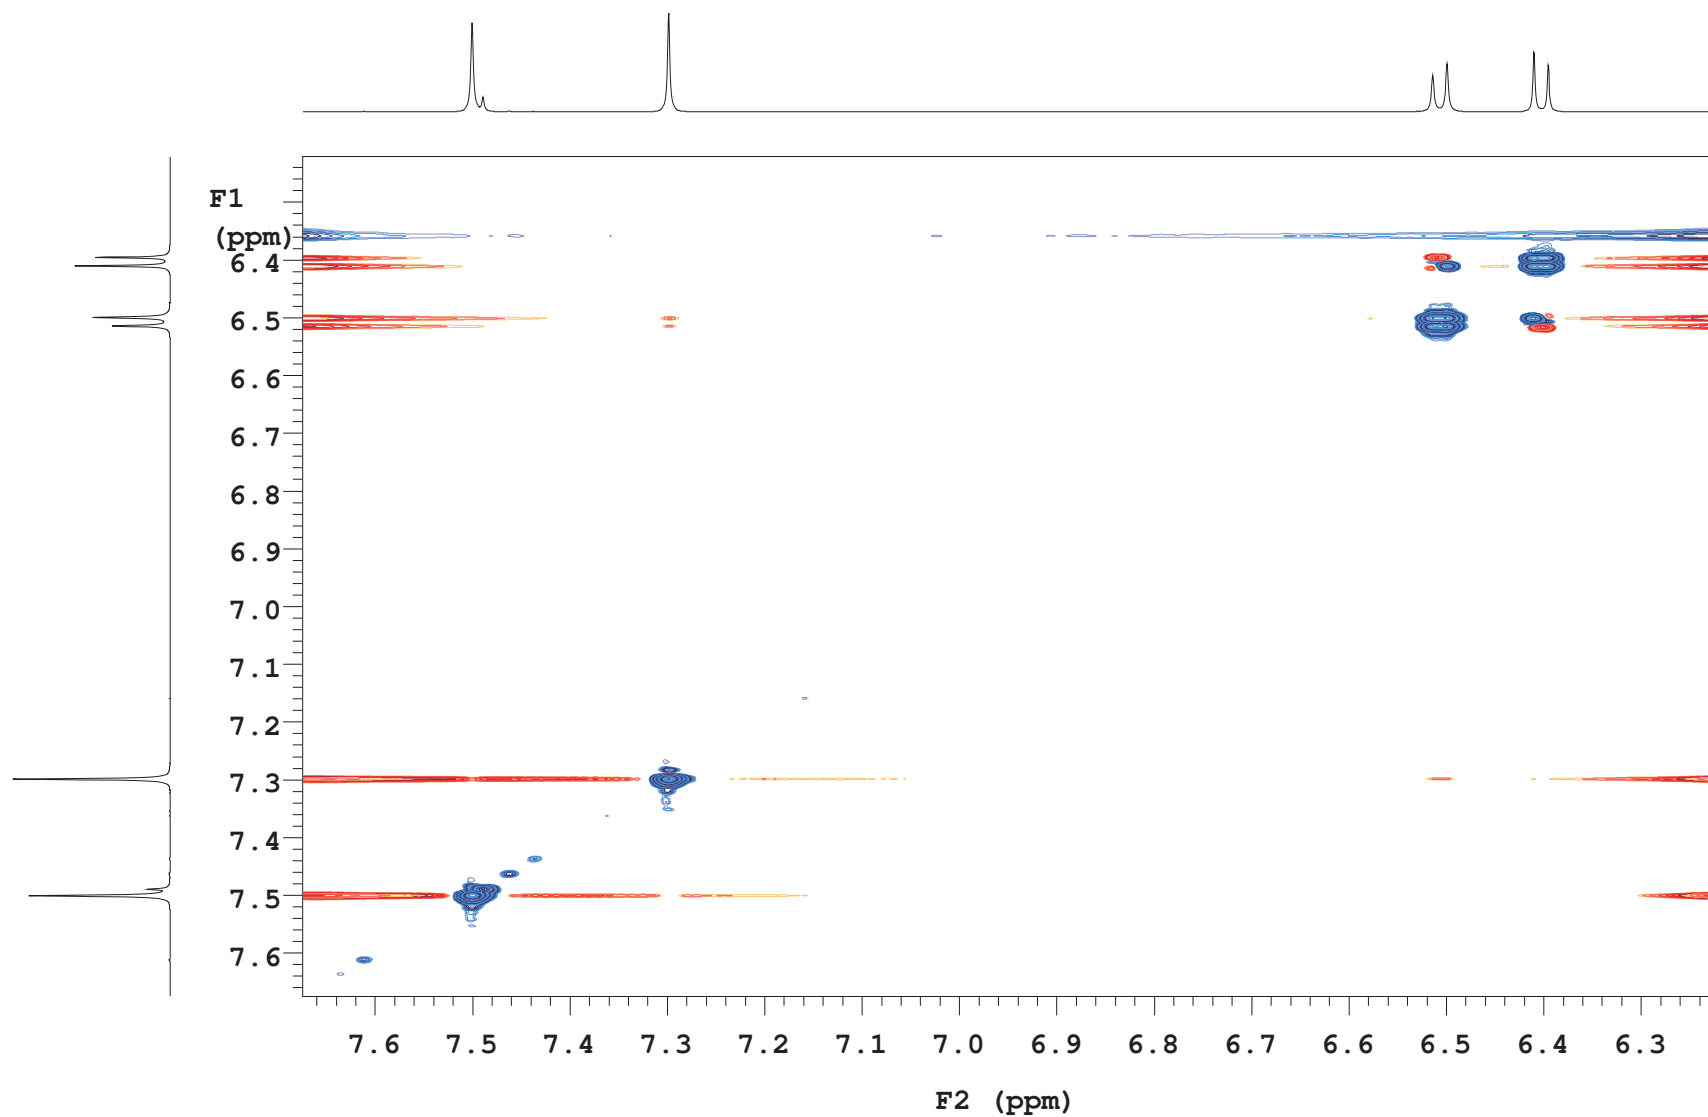

Figure. S3B

# Compound **15**

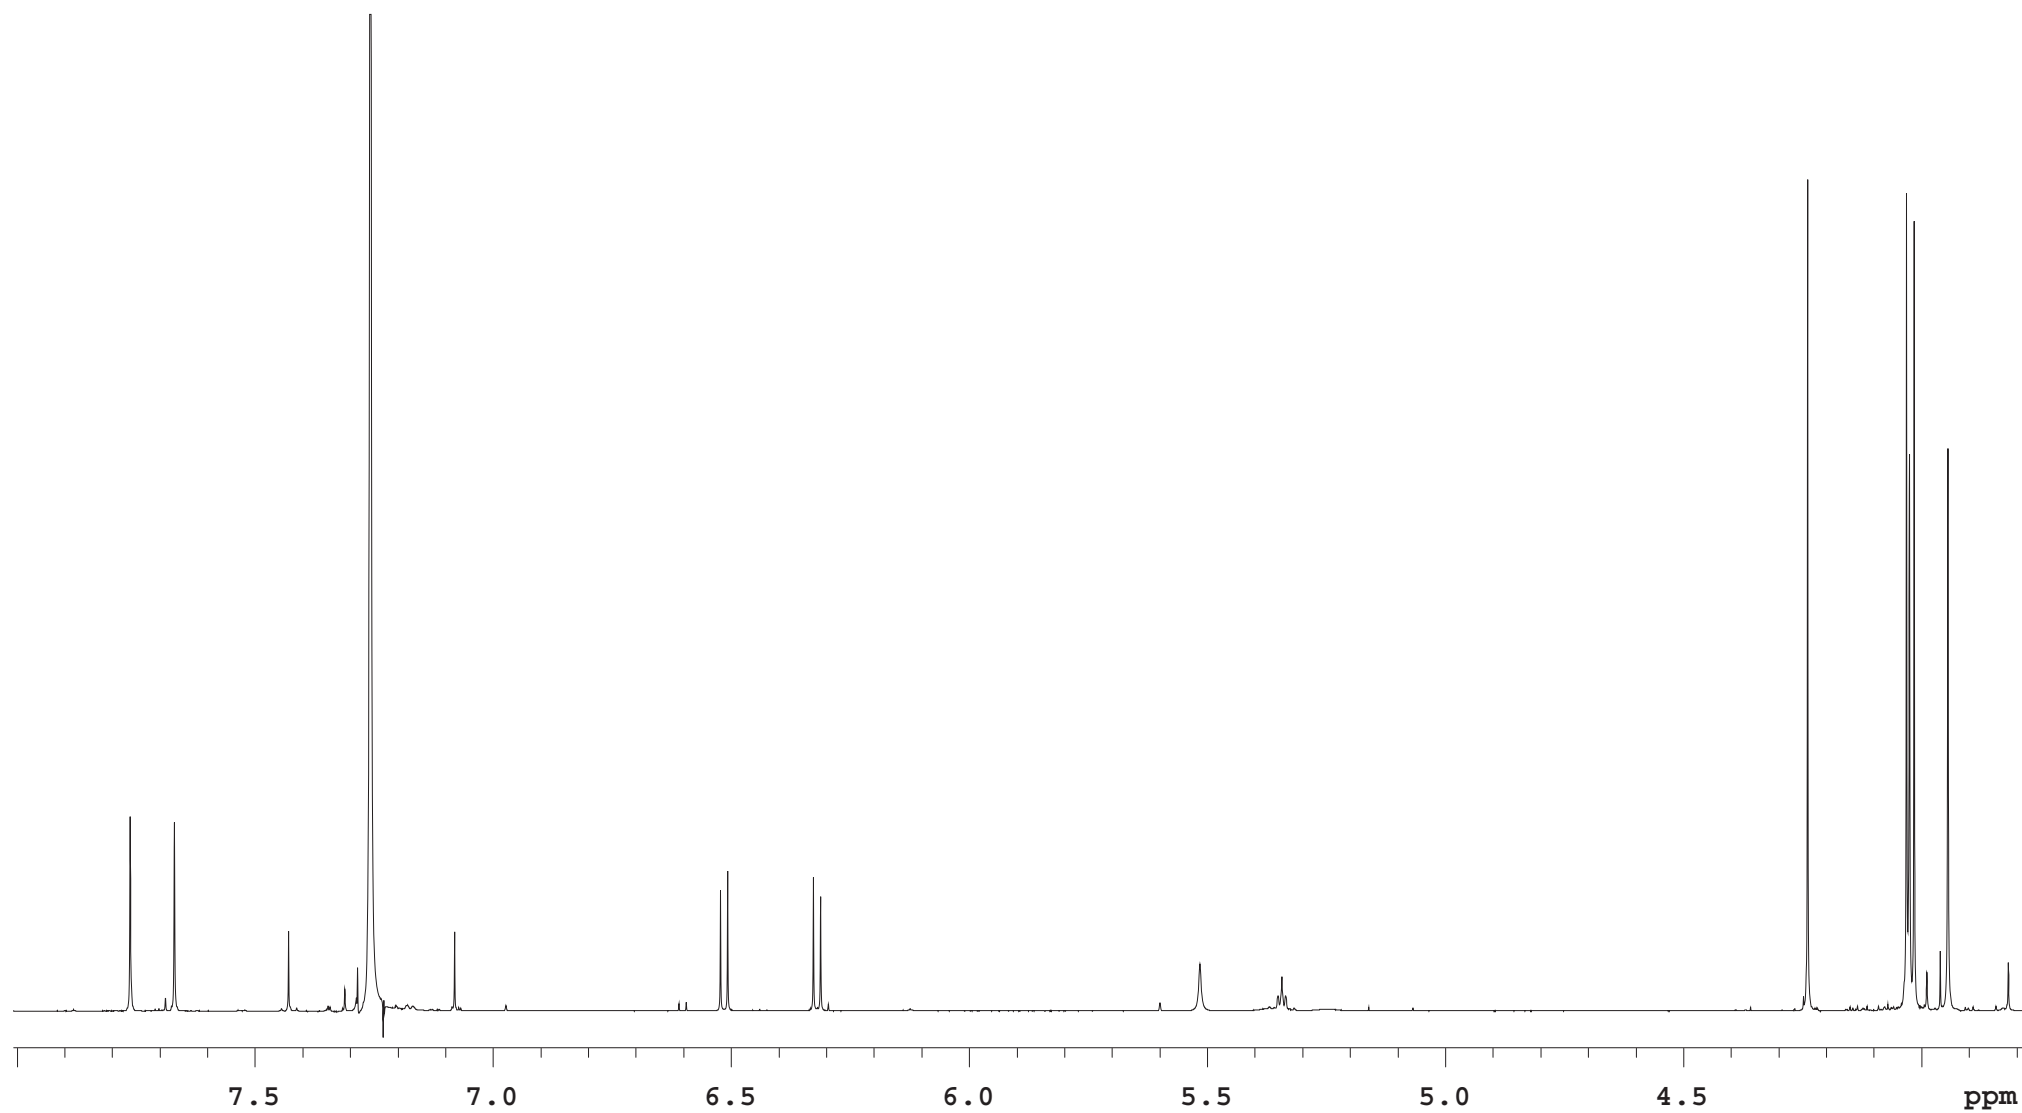

Figure. S4A

# Compound 15

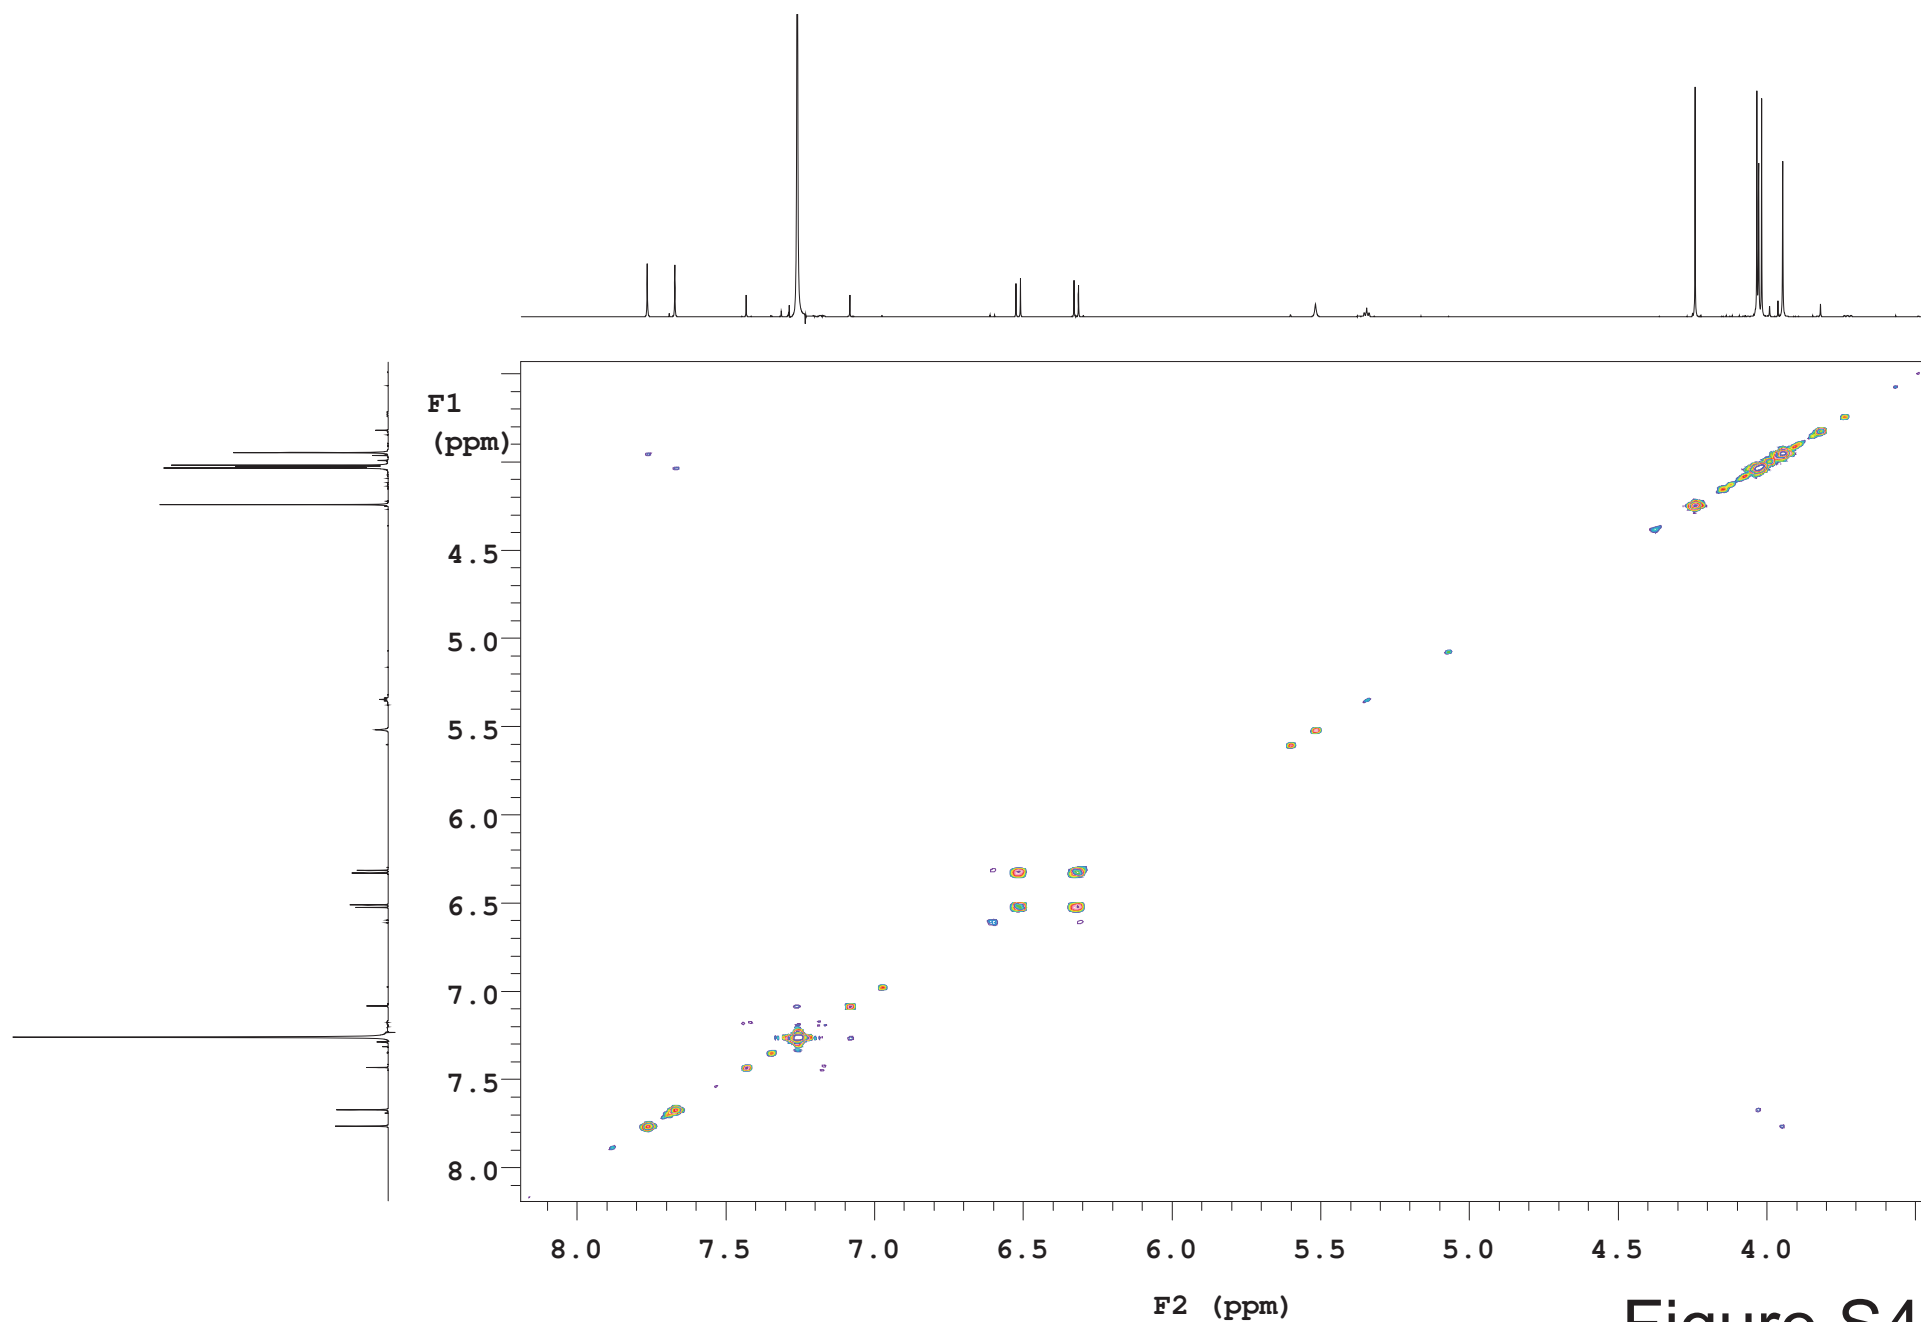

Figure.S4B

# Compound 15

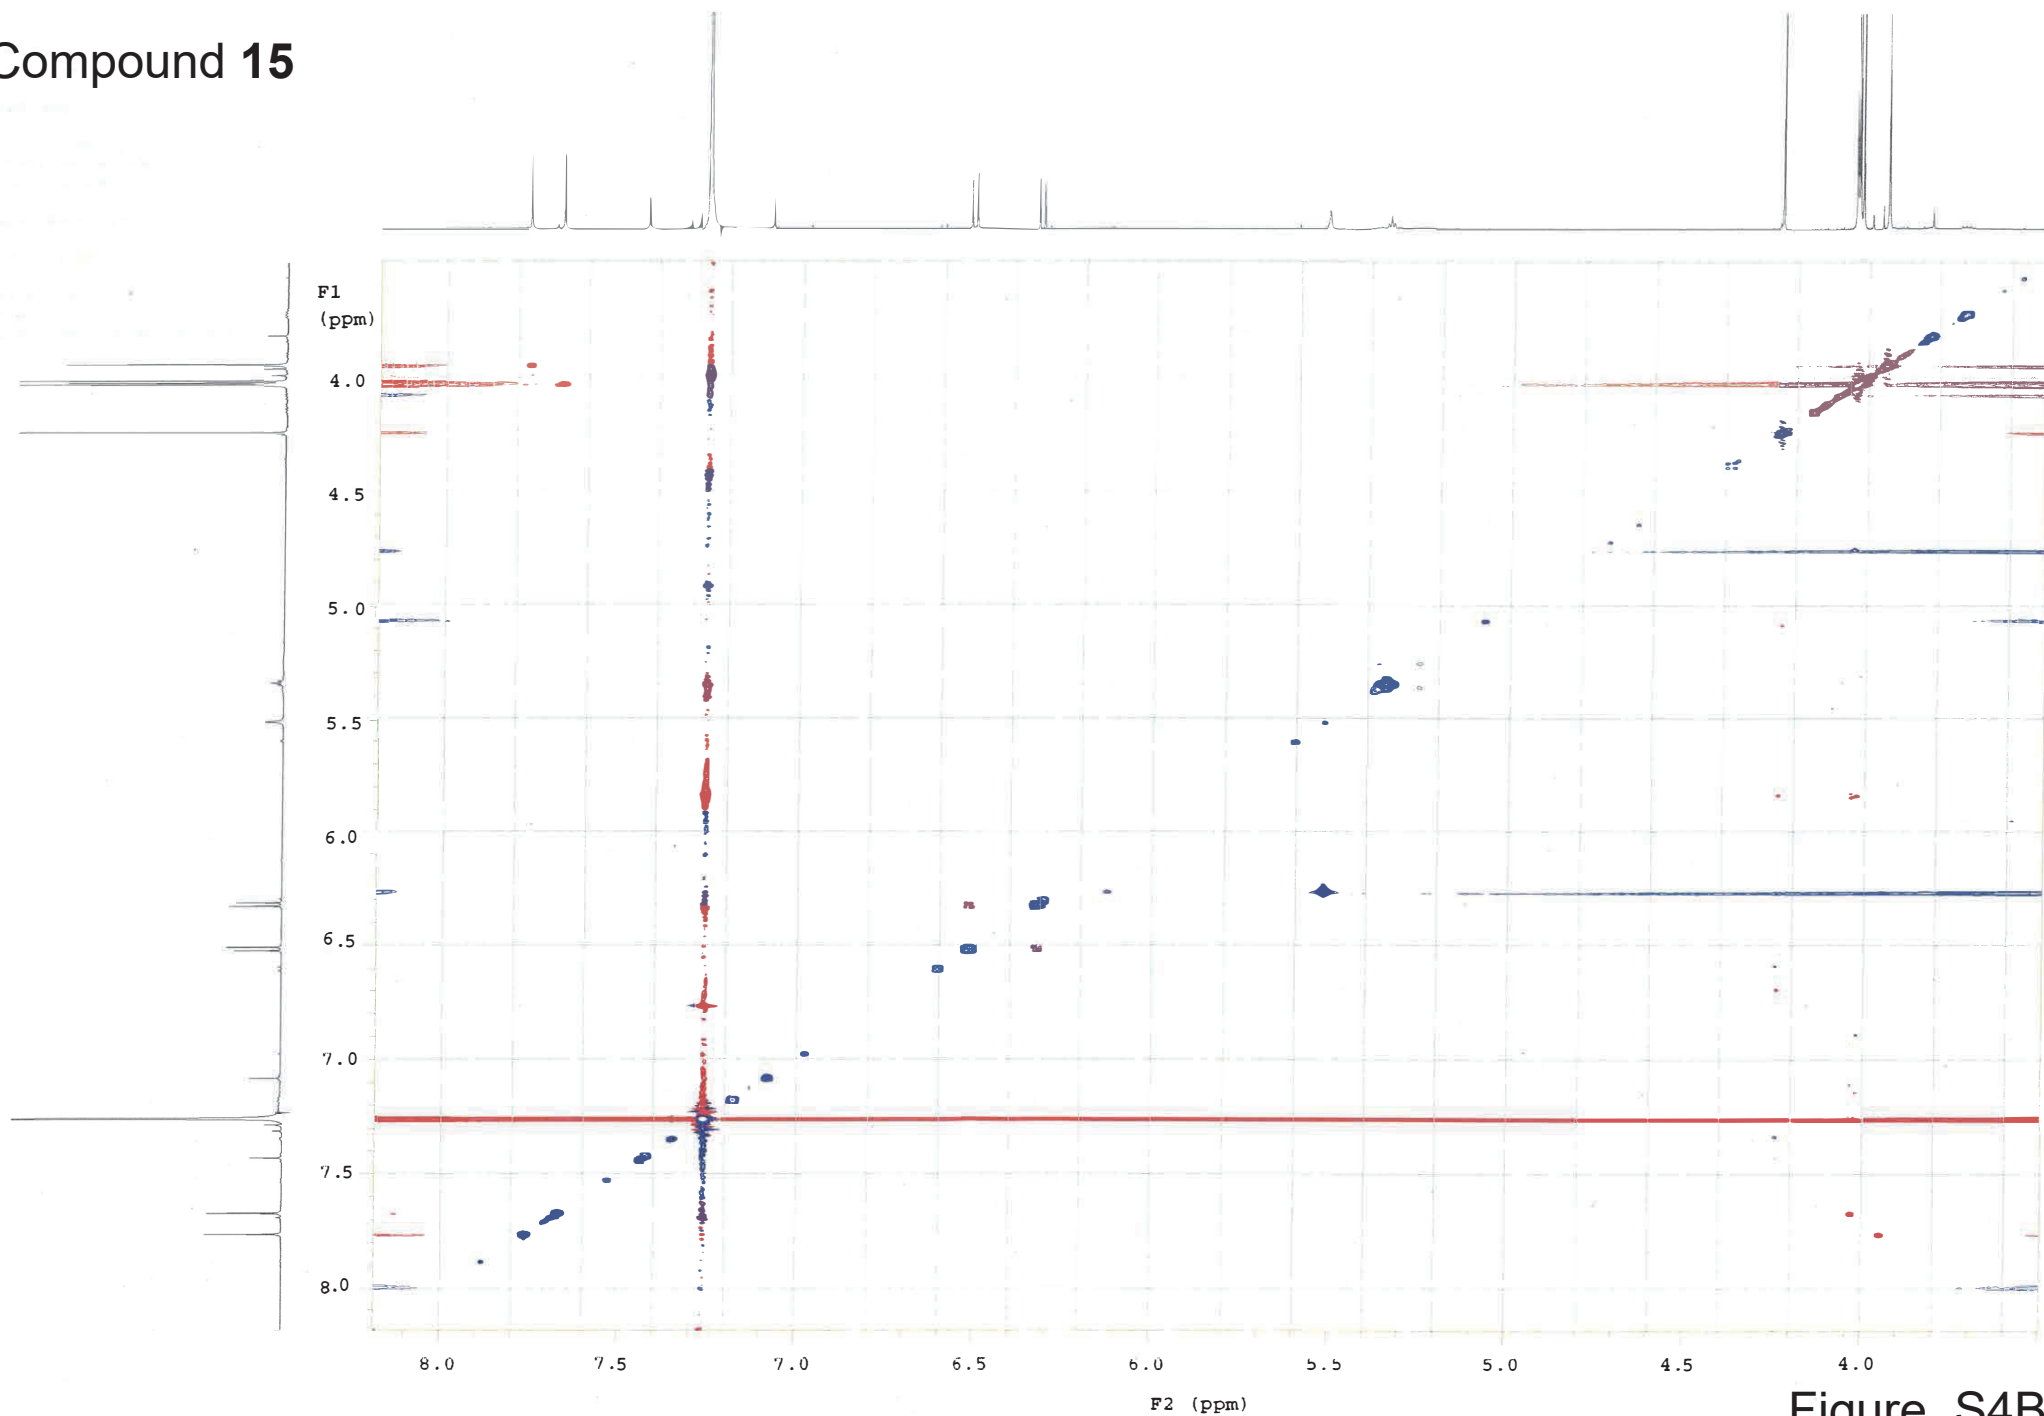

Figure. S4B



# Compound **16**

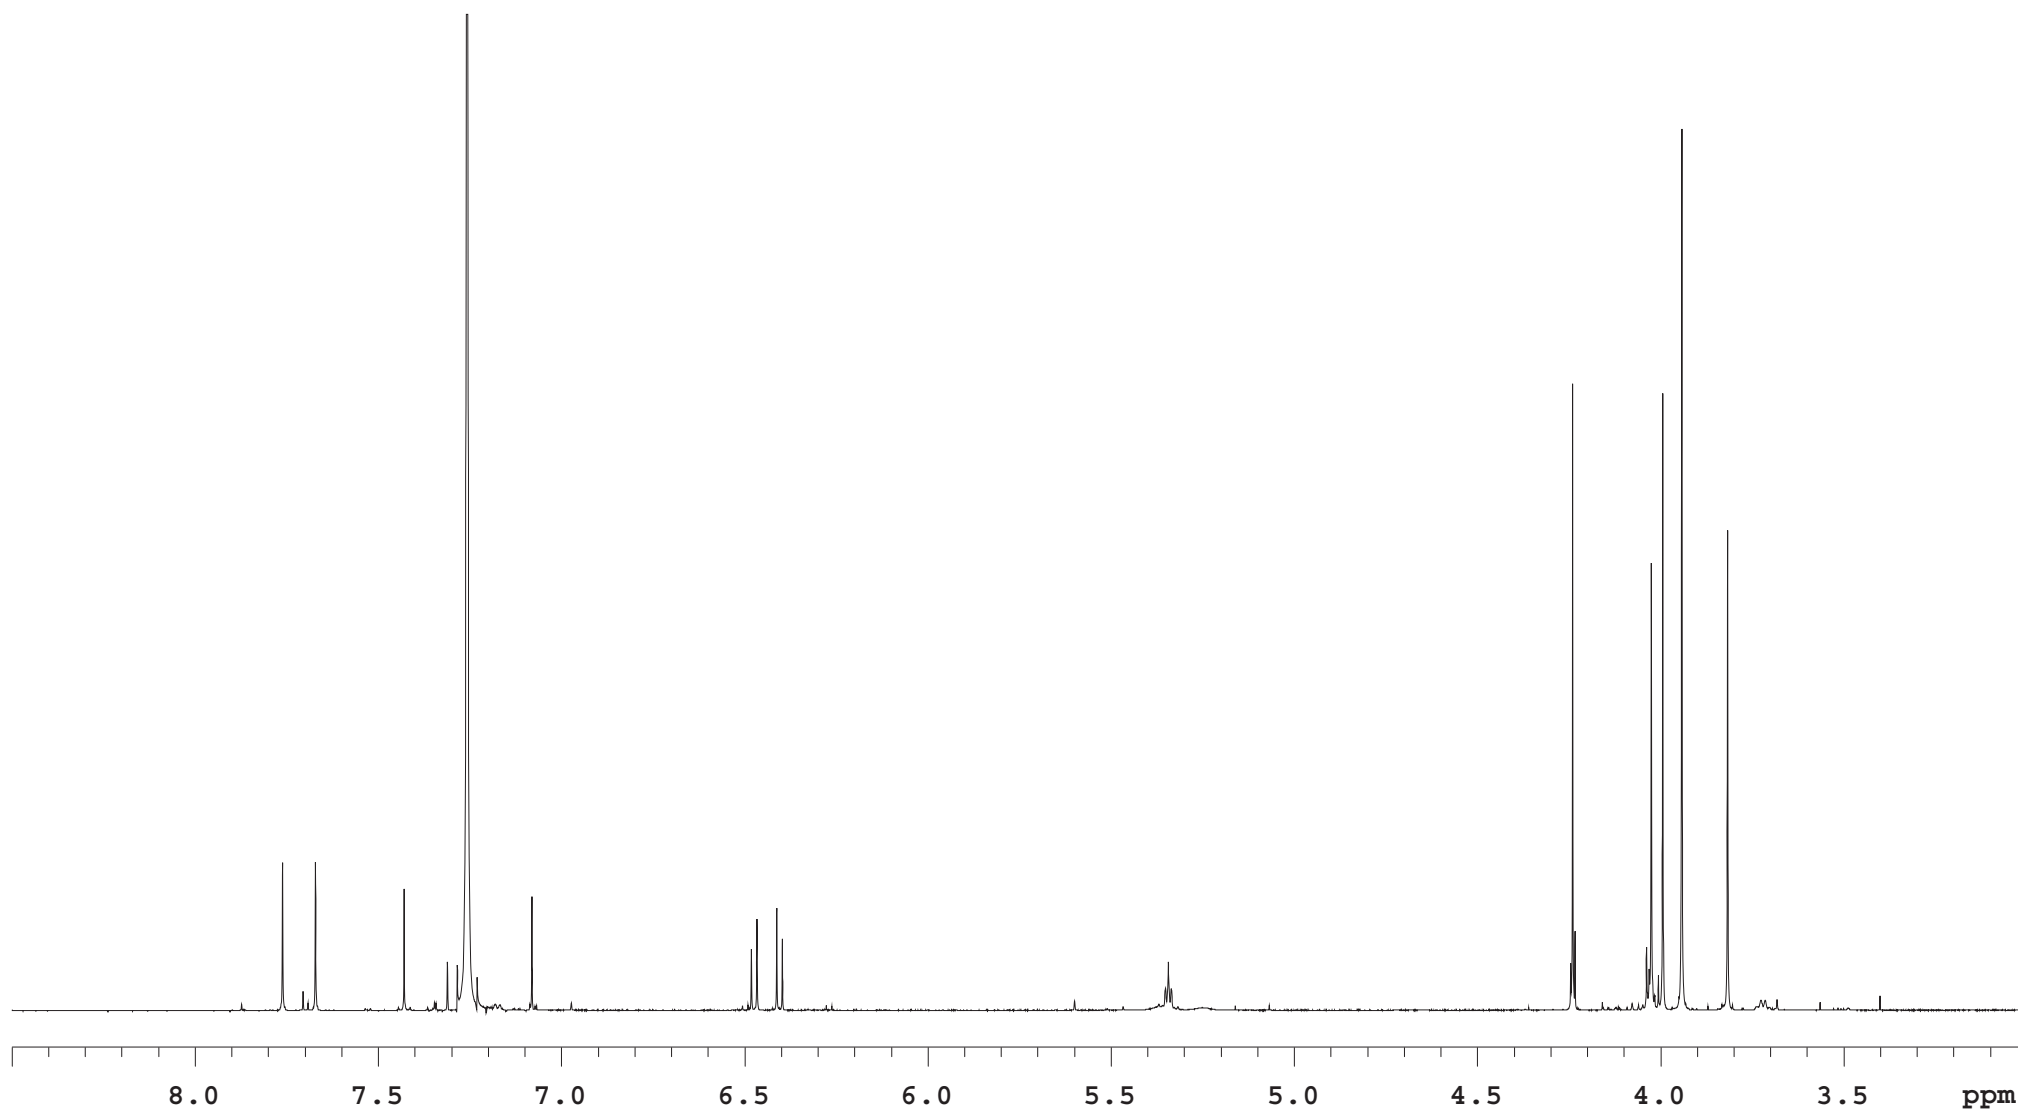

Figure. S4A

# Compound 16

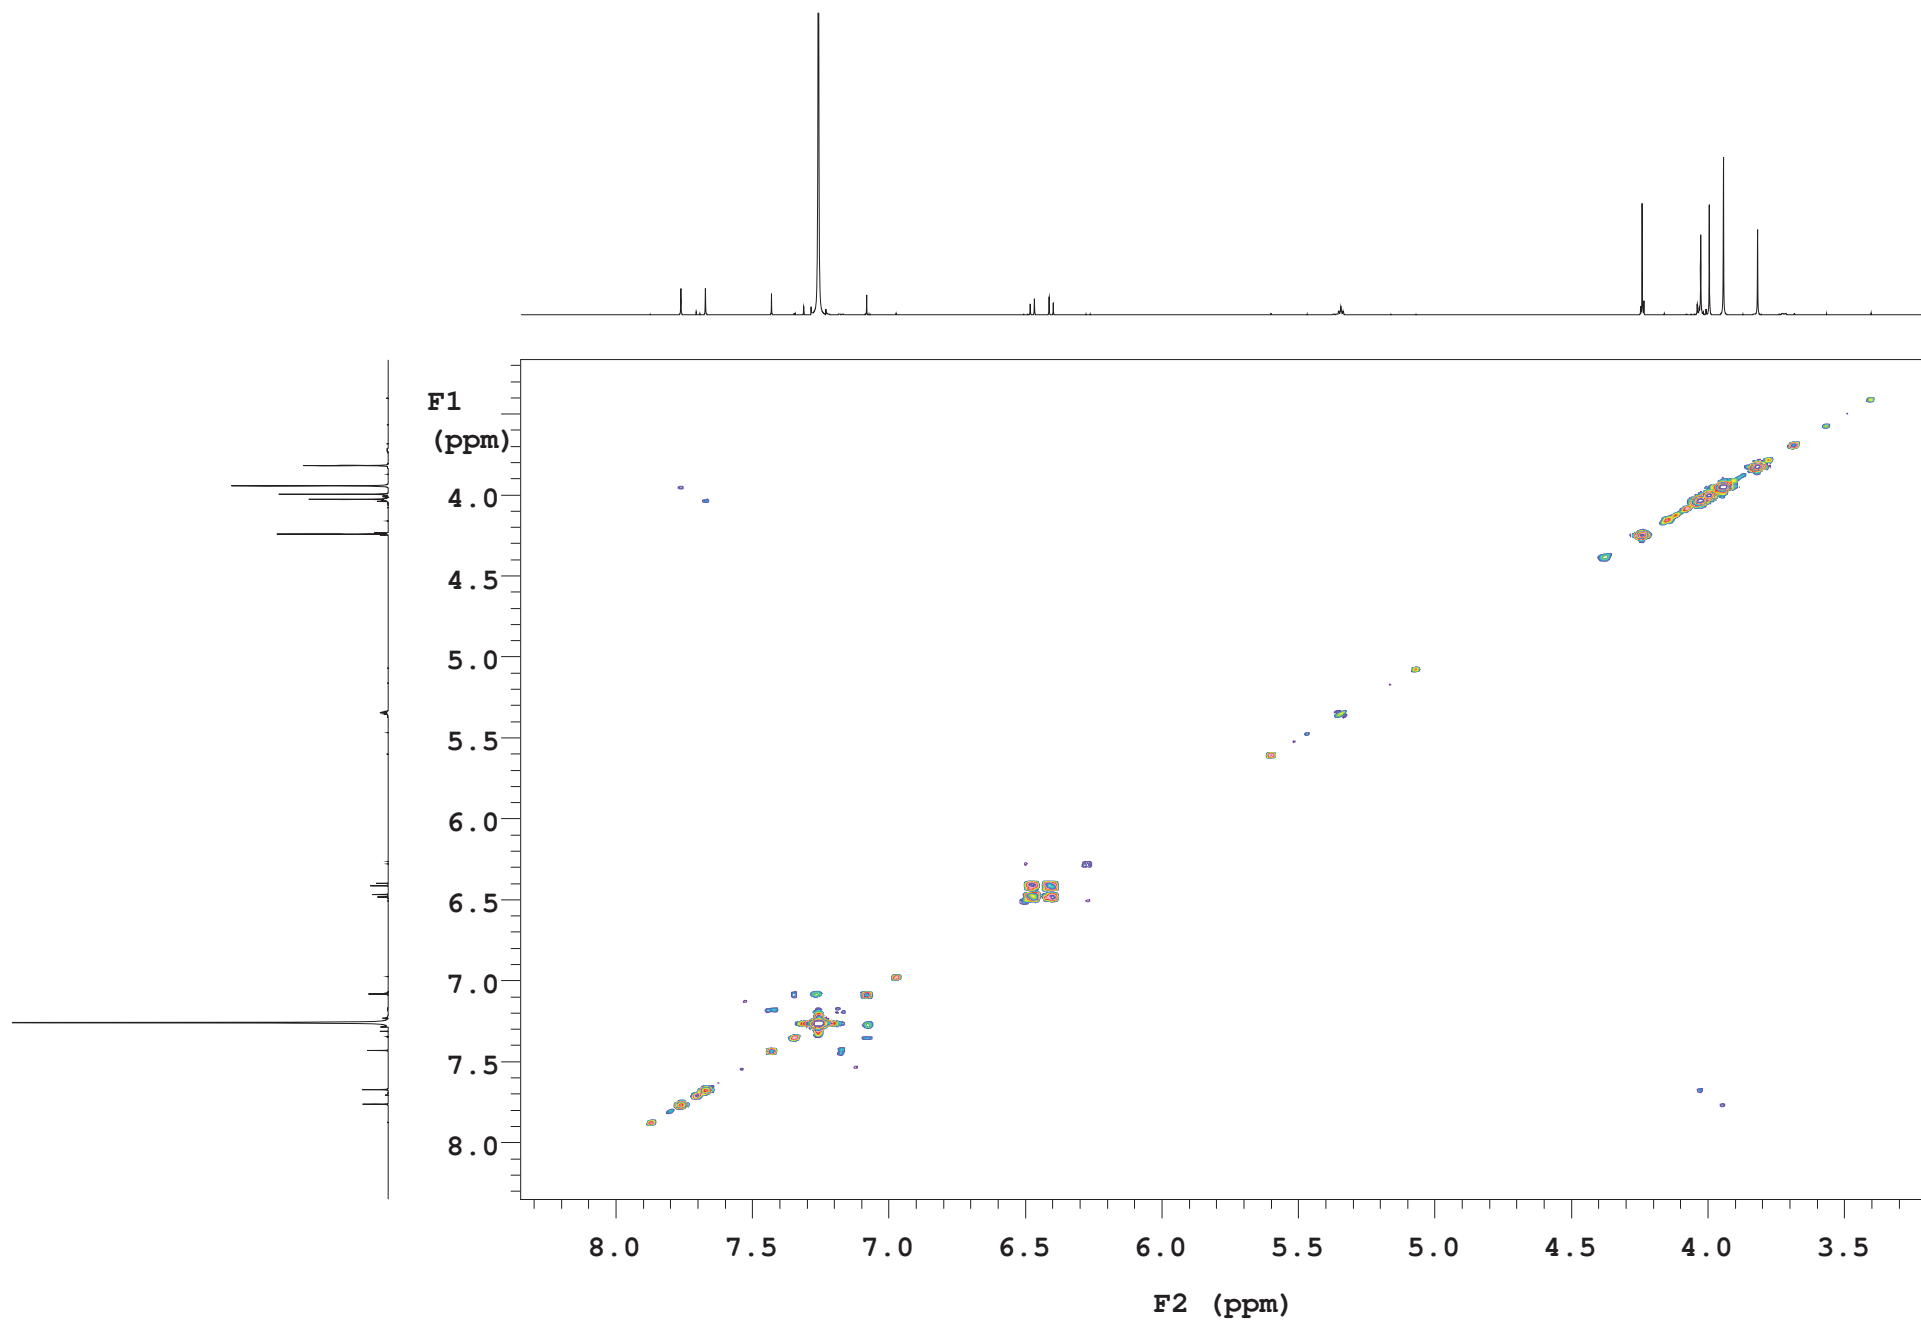

Figure. S4B

# Compound 16

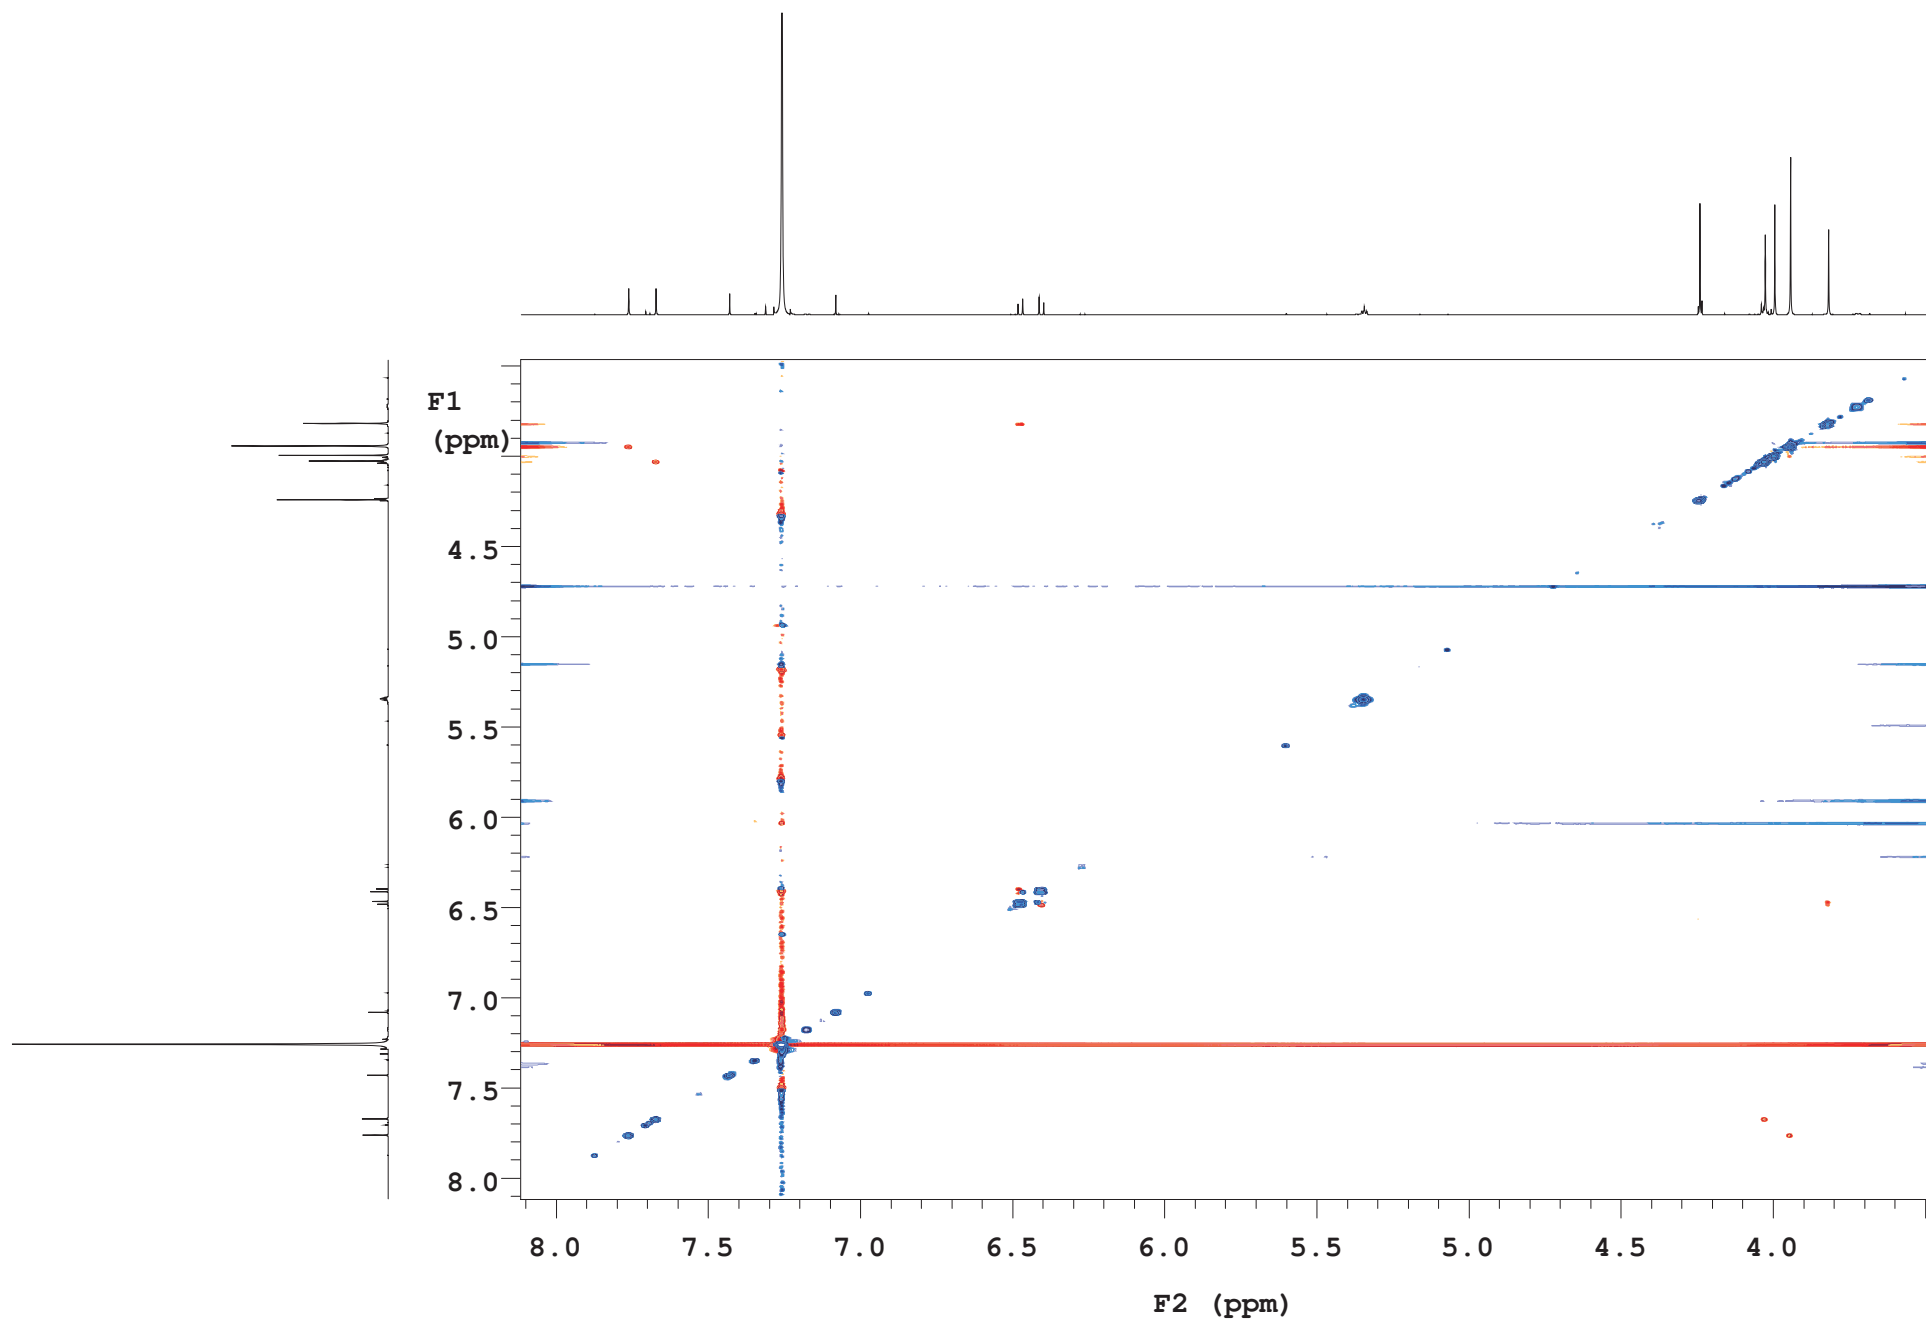

Figure. S4C

# Compound **17**

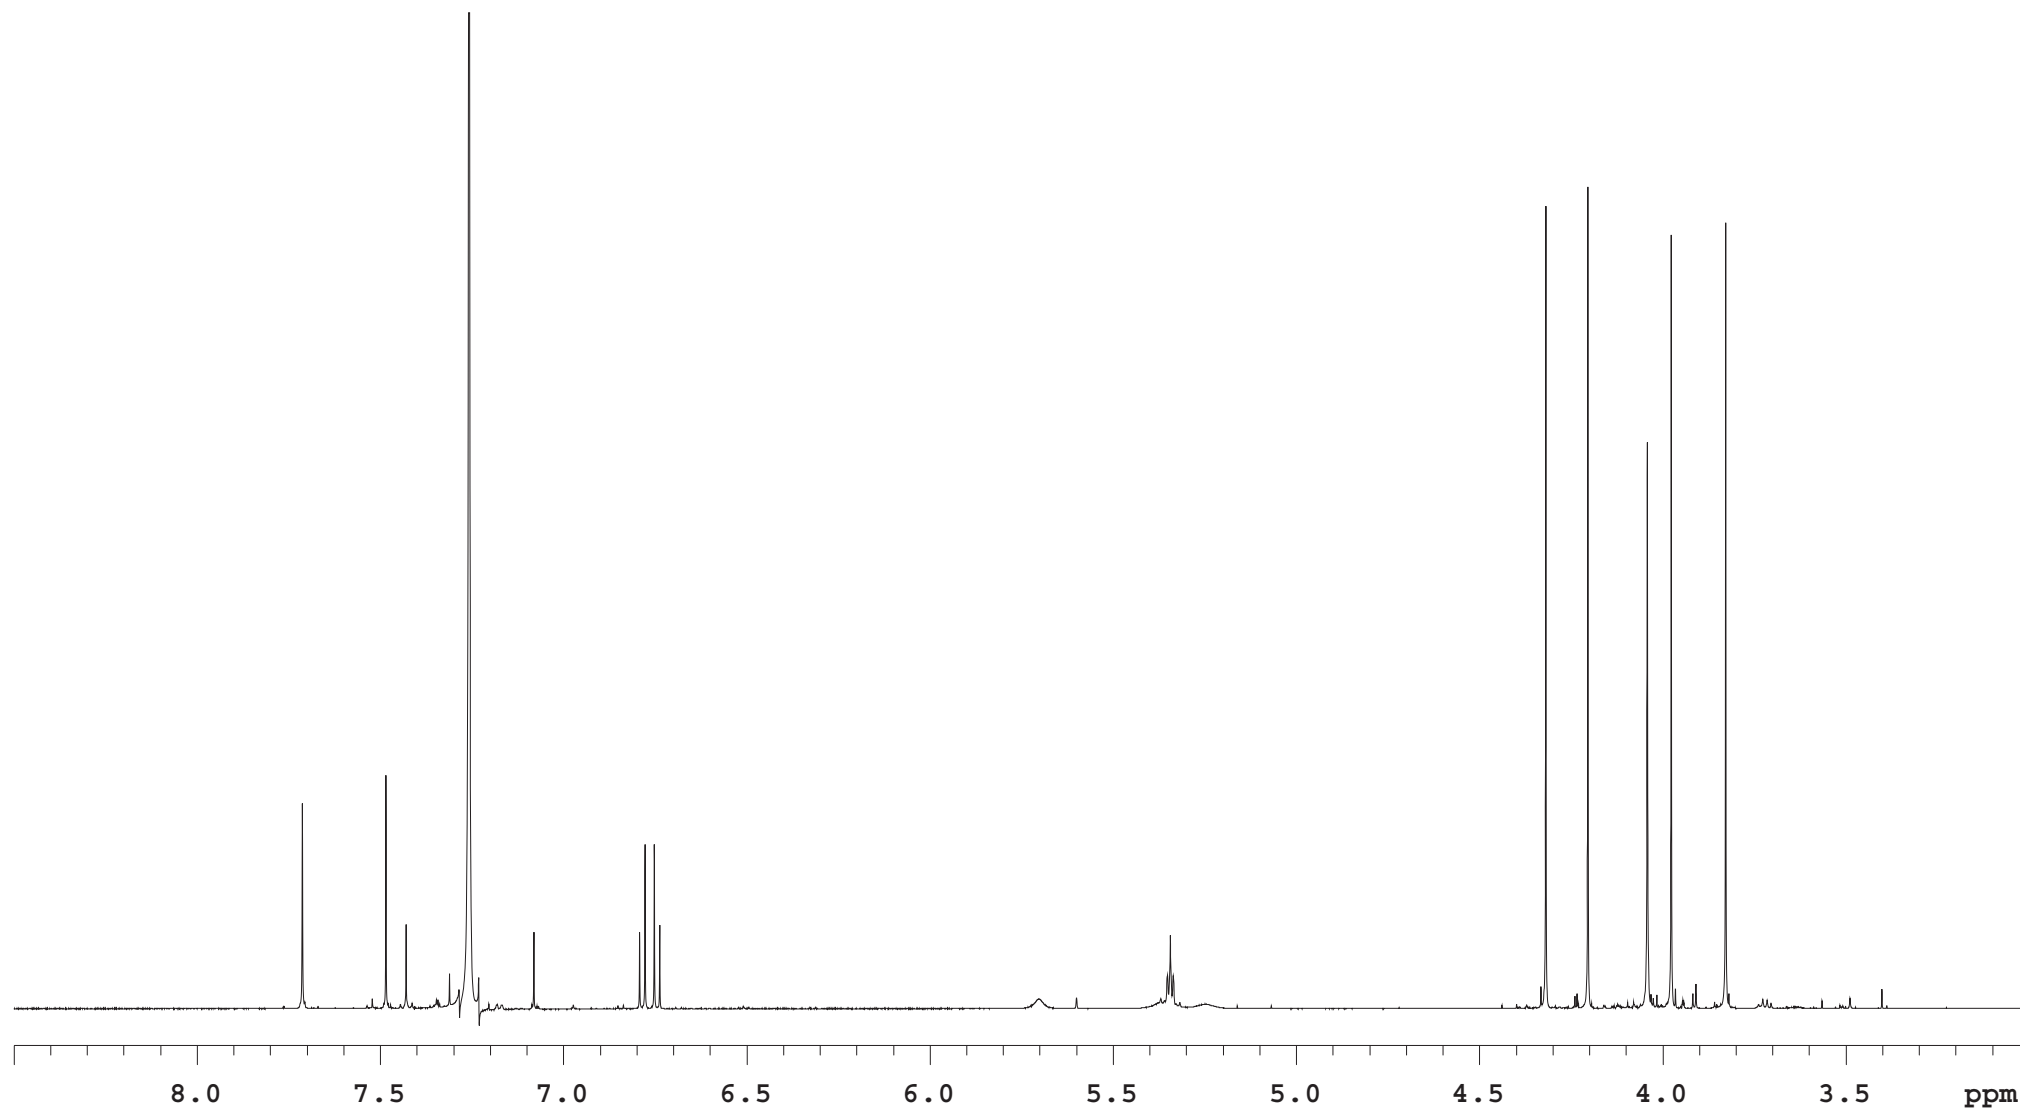

Figure. S4A

# Compound 17

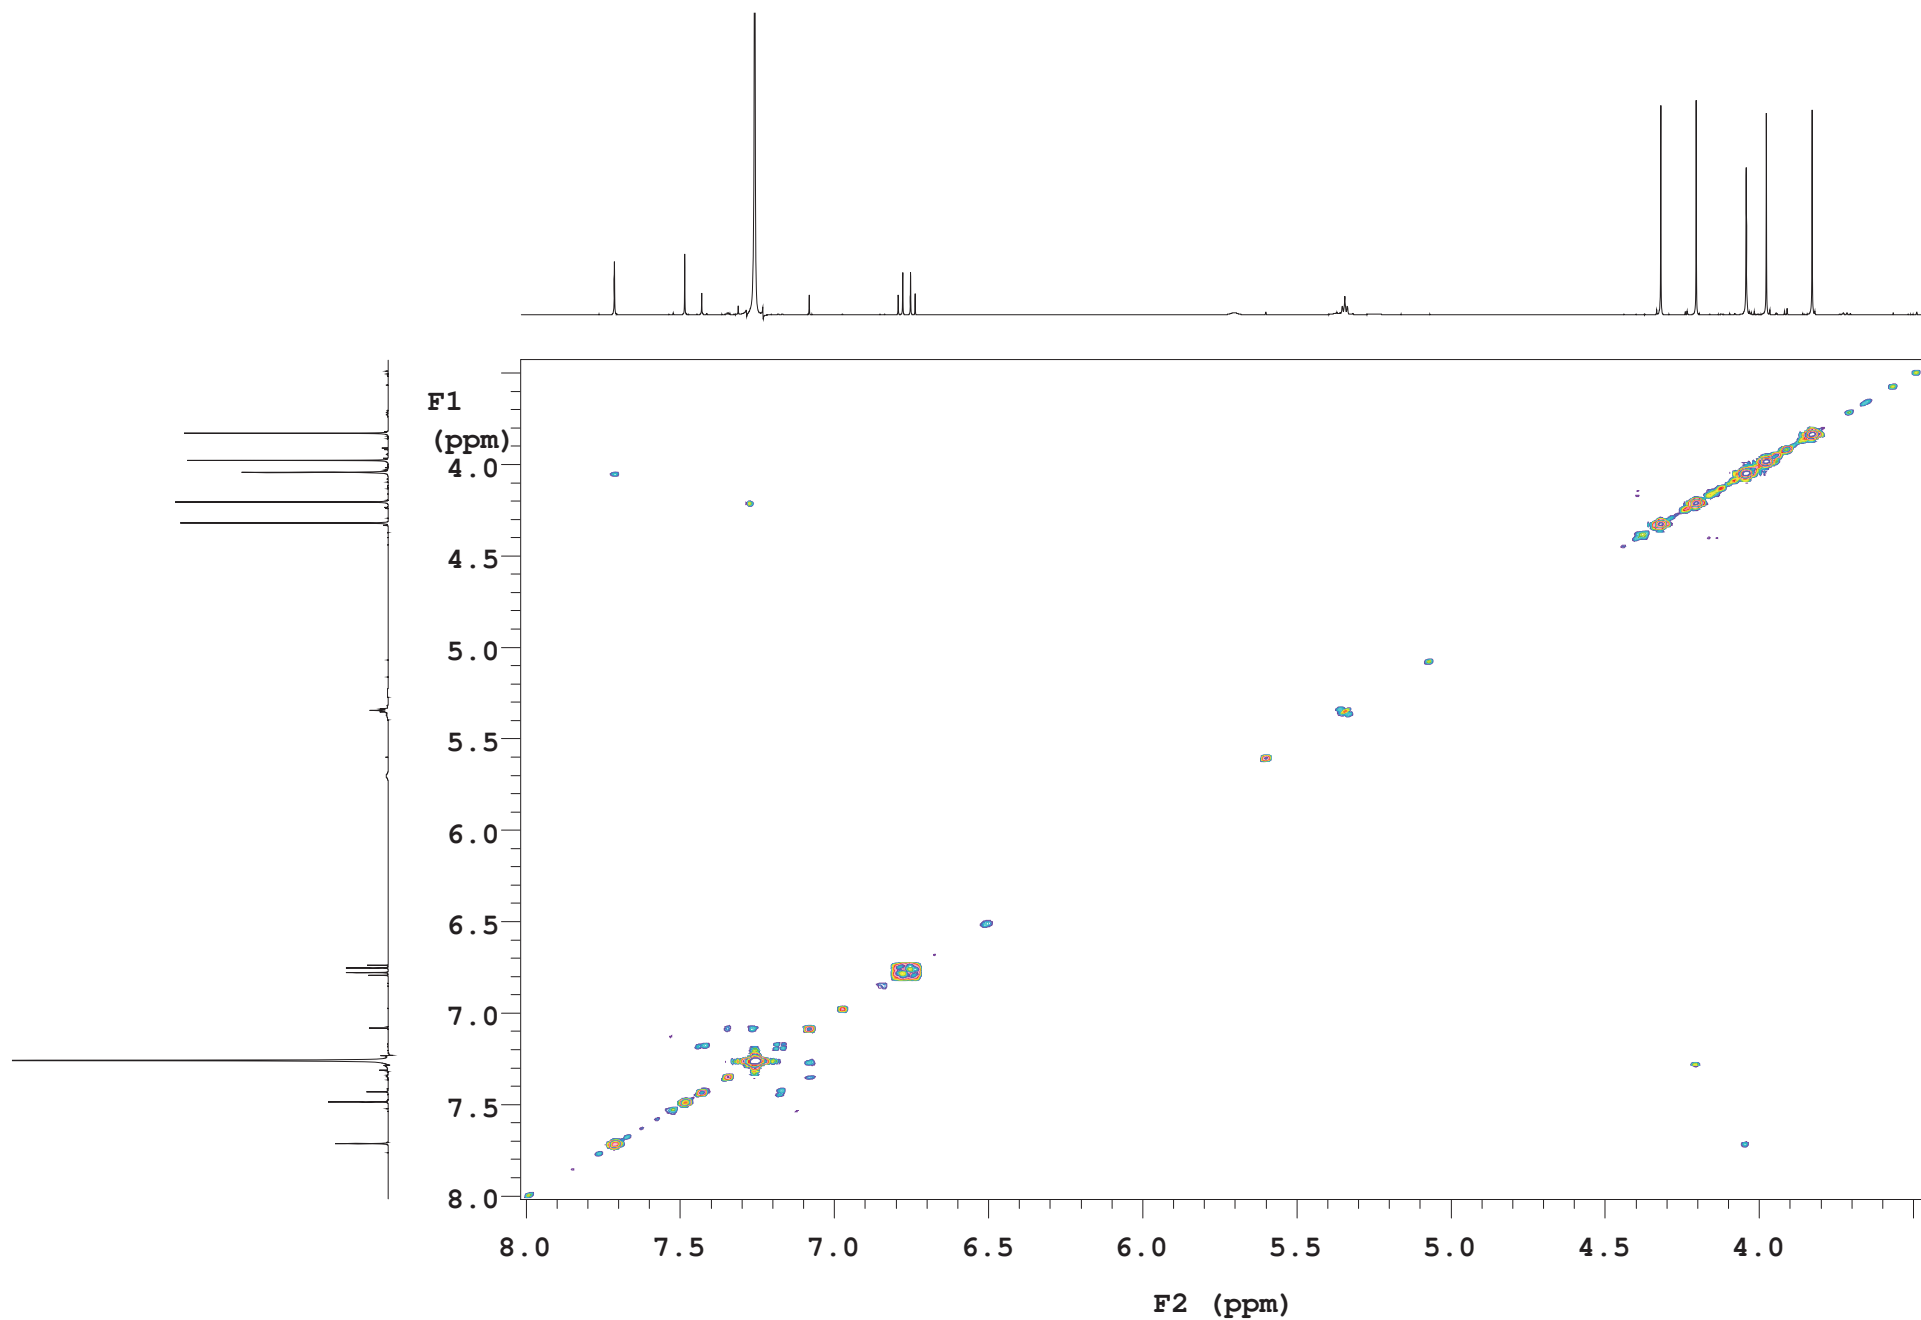

Figure. S4B

# Compound 17

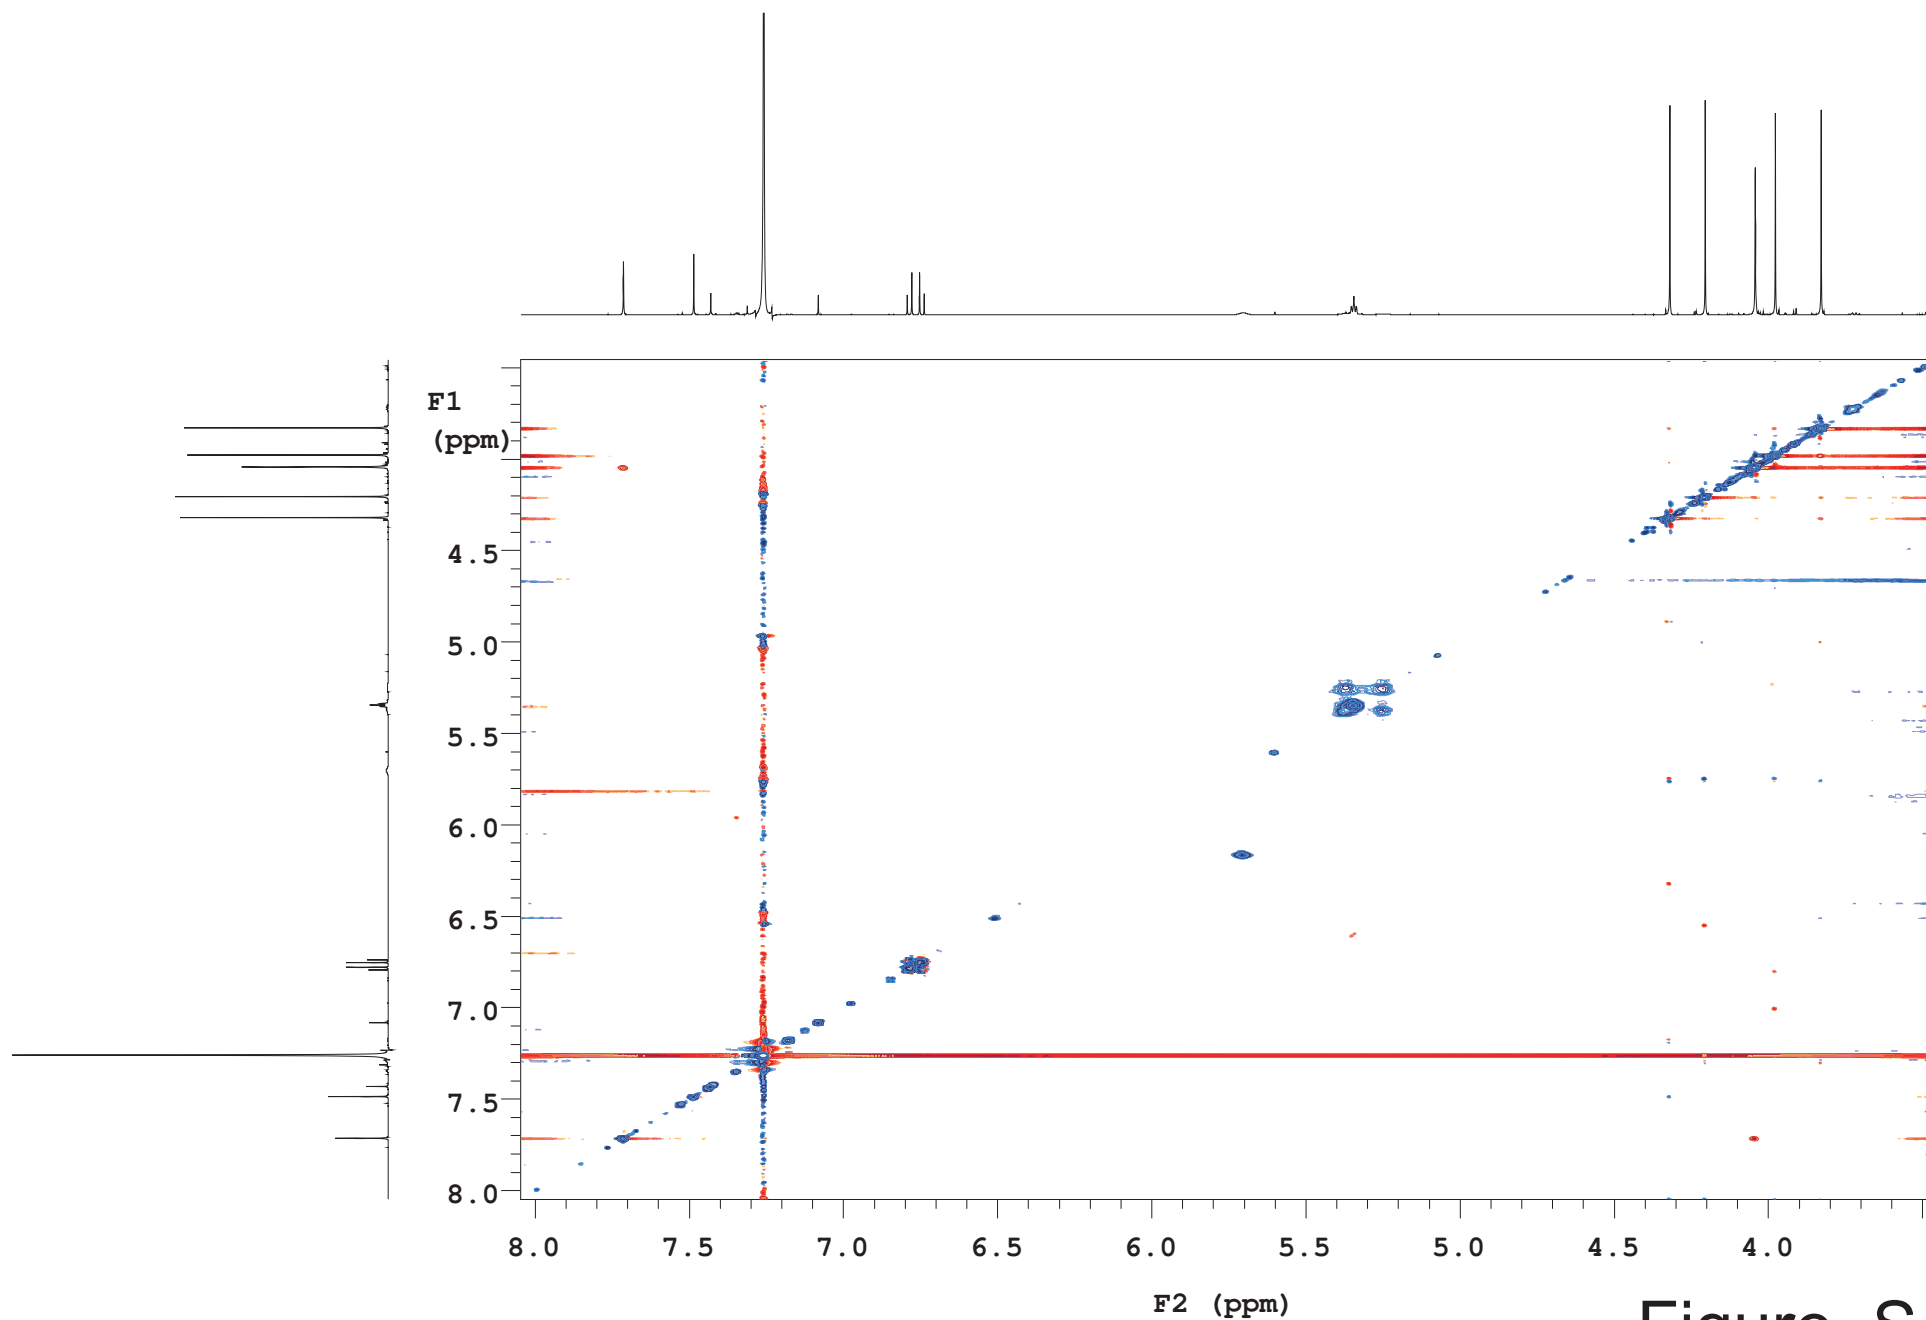

Figure. S4C

# Compound **18**

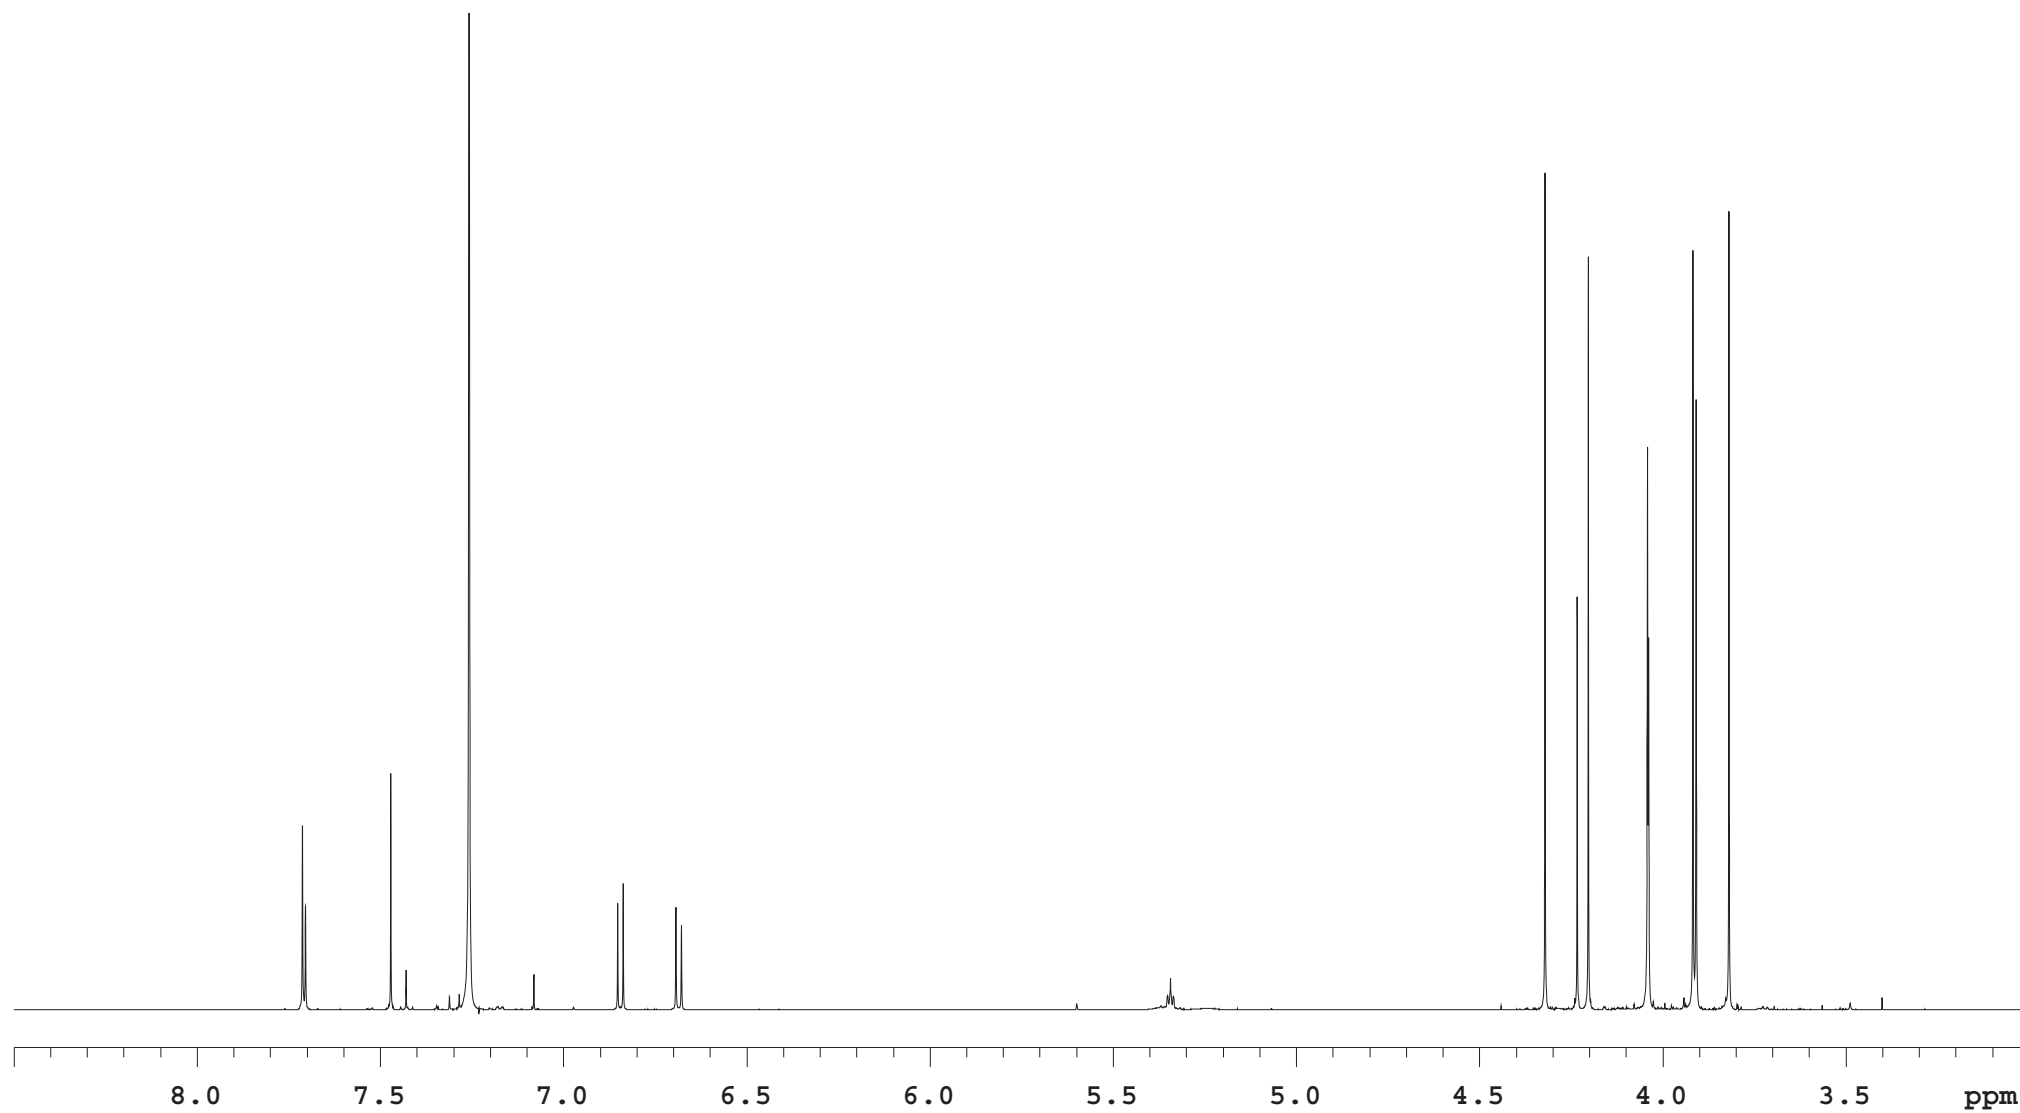

Figure. S4A

# Compound 18

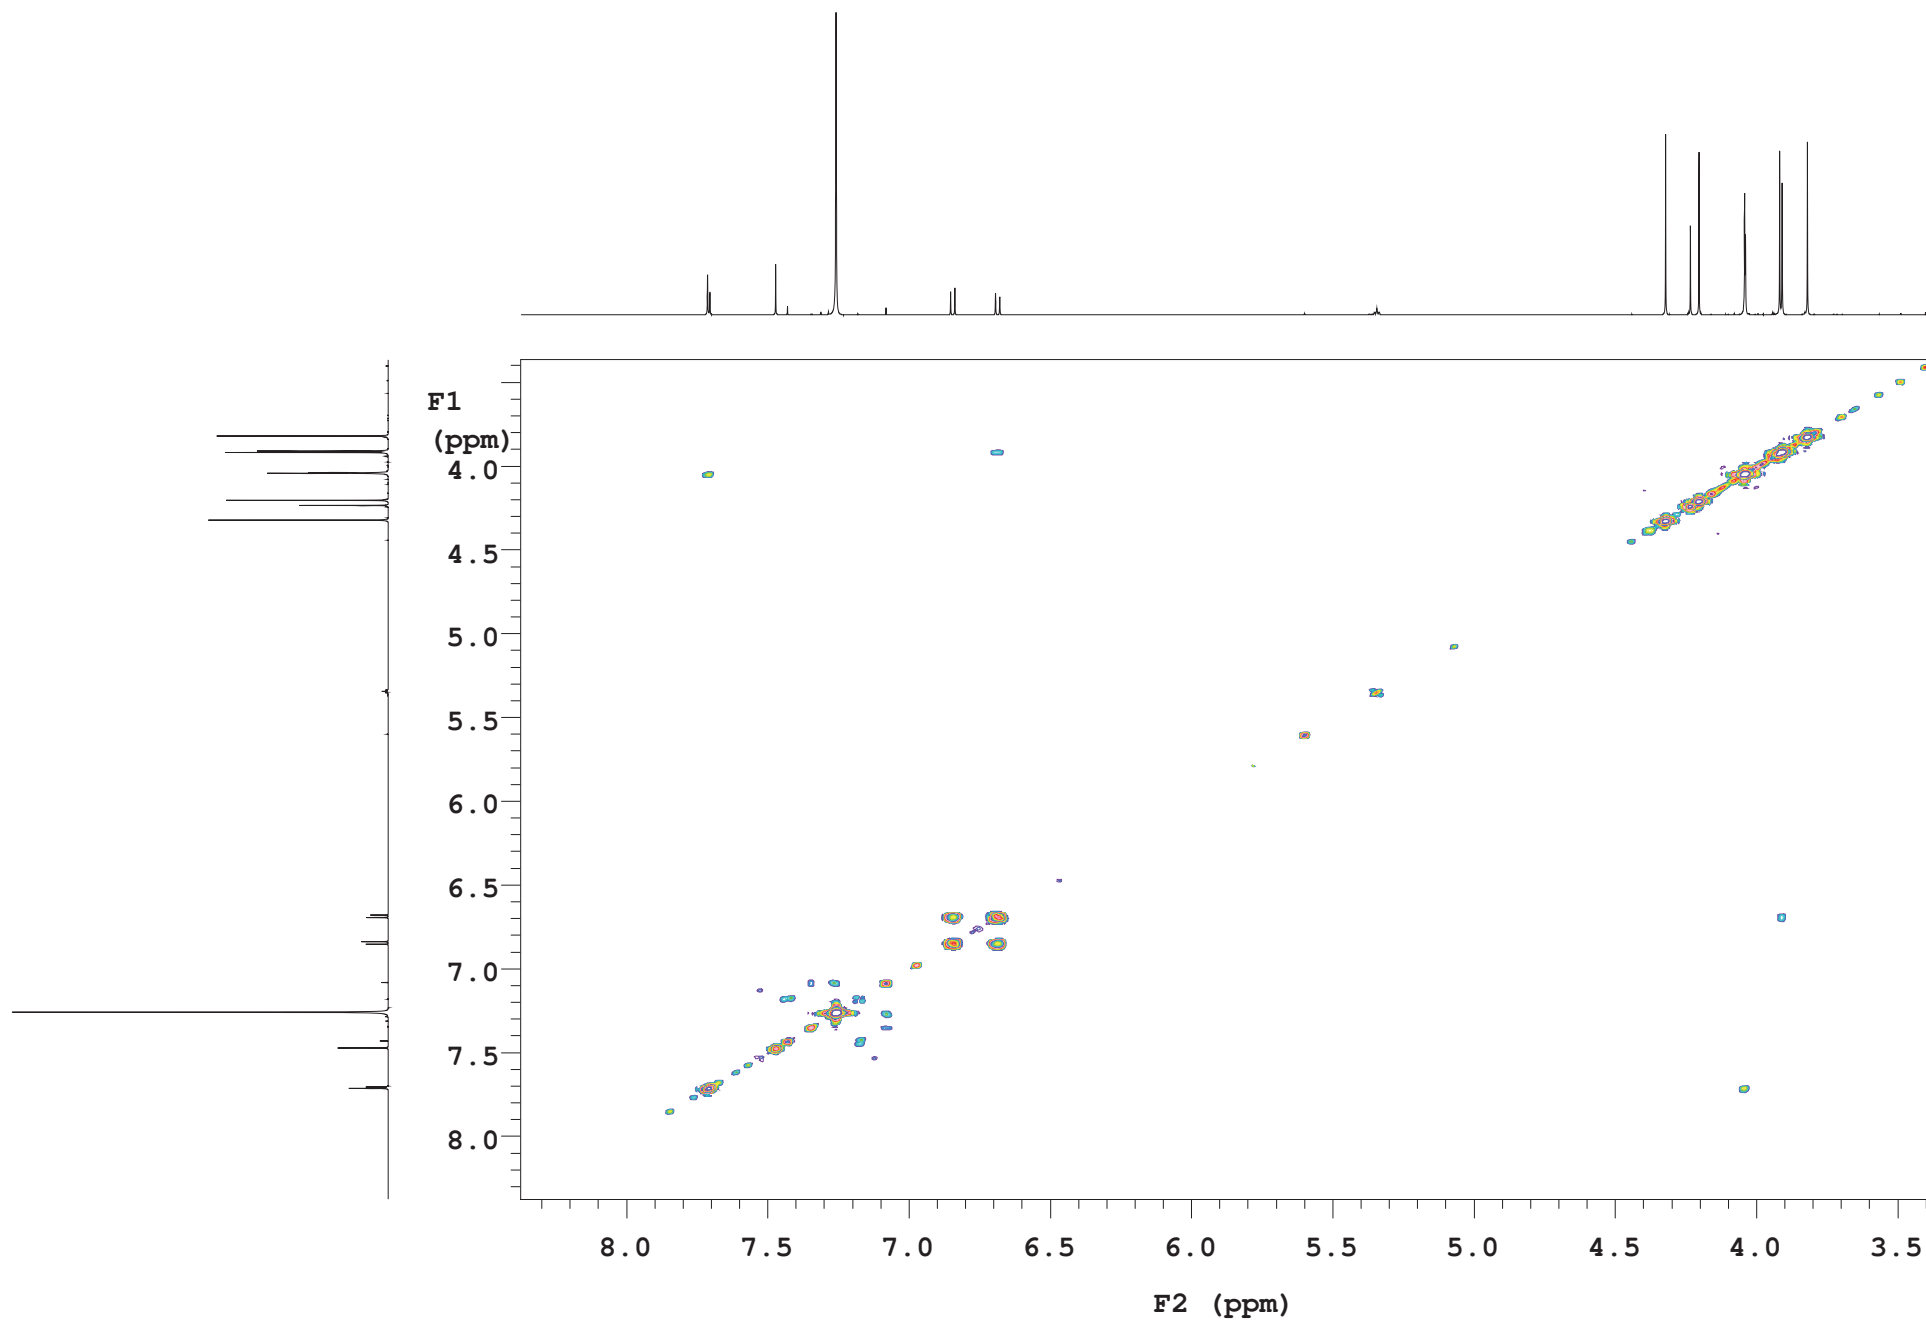

Figure. S4B



# Compound 18

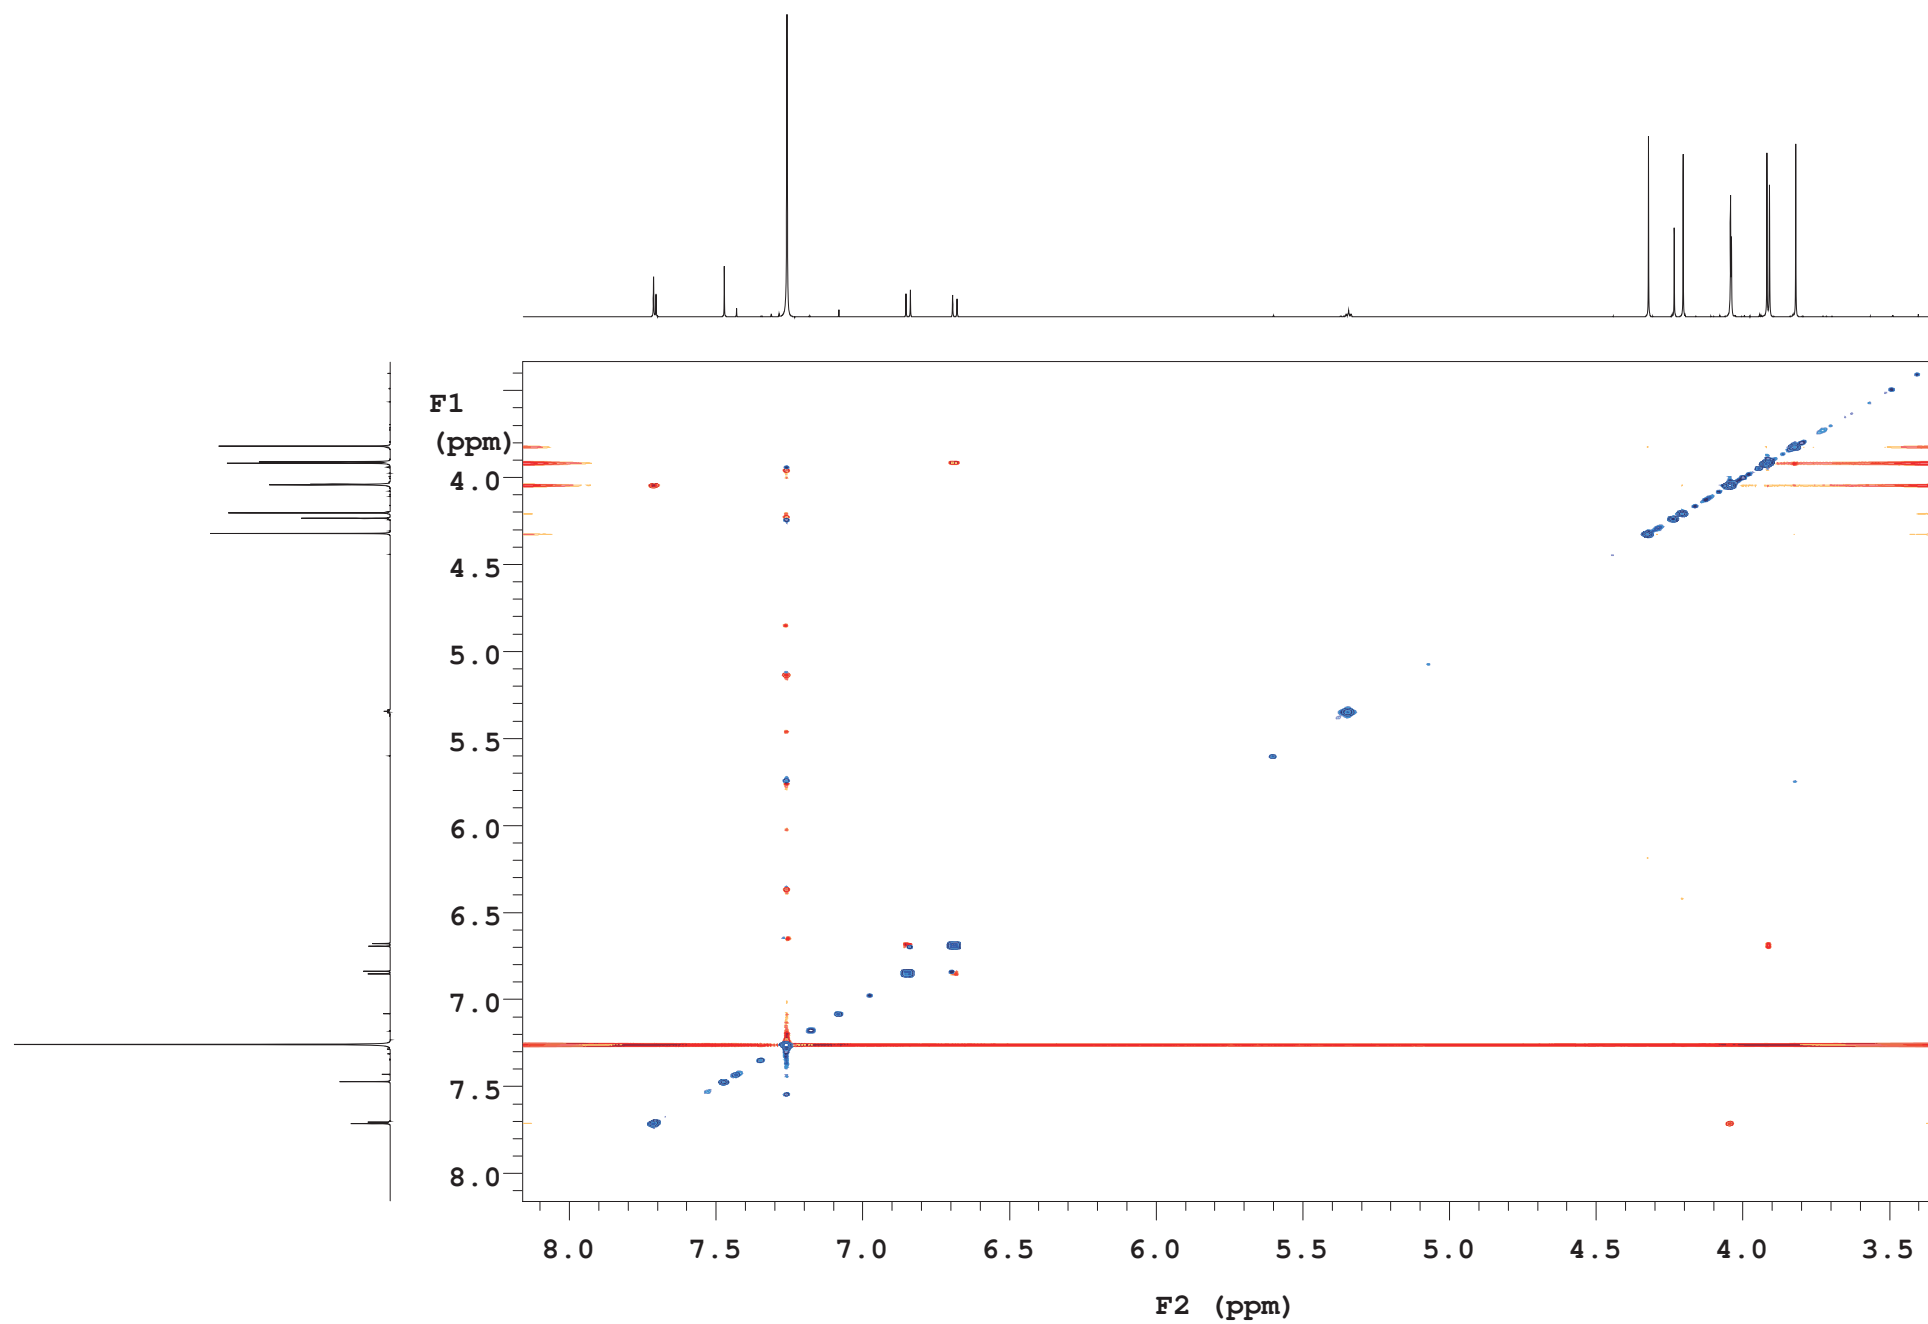

Figure. S4C
